# Supplementary material for: Unveiling spatial and temporal heterogeneity of a tropical forest canopy using high-resolution NIRv, FCVI, and NIRvrad from UAS observations
Source: Copernicus journal article supplement (doi:10.5194/bg-2021-95), 2021-04-19
Supplement: Supplementary file [file bg-2021-95-AC4-supplement.pdf]

## **BG Reviewer Comments:**

**RC1:** 'Comment on bg-2021-95', Anonymous Referee #1, 04 May 2021

### **Summary of the research and my overall impression**

Merrick and coauthors present a novel dataset of remotely sensed vegetation indices (VIs) (NDVI, EVI, NIRv, NIRvrad, FCVI) from an UAS in a tropical forest canopy in Panama. They explore both spatial and temporal variability between indices and highlight potential uses for these indices at those varying scales. Specifically, the authors explore temporal correlations between GPP and VIs over the course of a day, diurnal changes in the spatial variation between VIs, and dominant spatial scales for variability in VI signals.

The paper is generally well written and structured and provides exciting insights on how VIs relate to each other. Both the dataset and the comparison are novel and within the scope of BG. Additionally, such direct comparisons between VIs are highly valuable because they provide insight in a field saturated with different VIs as to which VIs are most applicable for certain questions and specific strengths and limitations of each. The data collection approach is largely appropriate for the study, however, the temporal resolution of measurements is a major limitation. Additionally, the authors make claims about their findings in relation to SIF measurements that are not sufficiently substantiated. These major concerns are outlined with more specifics below.

Overall, this is an interesting study that will be of interest to the scientific community but needs some revisions to clarify what their findings are vs. what their findings imply. Therefore, I recommend this paper be accepted with major revisions.

### **Major Concerns**

- The methods section is quite dense and difficult to follow. This makes it challenging for the reader to connect measurement approach to the presented results. I recommend the authors present some sort of conceptual figure showing their measurement approach and processing. I think this will be highly beneficial, particularly for a study that explores spatial variability.

Thank you for this suggestion. We have included a methods and materials summary diagram in Section 2 as a new Figure 1 (Lines 512-521).

- Only one day of GPP data is available. This has led to two specific issues:
  - I am concerned about the validity of a single day's worth of GPP data. I feel as though the statistics used to partition GPP from NEE may be insufficient with only one day available. It's worth some discussion about the limitations of this approach at a minimum. I believe Matteo uses more data to estimate GPP but we only present one day. Ask him to explain and fill in this response?
    - Thank you for pointing out the ambiguity in our description of the GPP from eddy covariance. The GPP estimates were derived from eddy covariance system data continuing several months, from which we extracted the one day of data. Unfortunately, due to a power issue,

these data were not available for the first day corresponding with the hyperspectral and lidar data collection.

- In section 3.1, the authors explore the diurnal trend in VI, PAR, and GPP data. They use this trend to draw conclusions over the utility of NIRvrad as a proxy for GPP. However, I do not believe one day of data is sufficient to draw such strong conclusions. Additionally, there is insufficient discussion over how potential physical (illumination, viewing direction, etc.) or environmental effects (drought, seasonality, etc.) may impact these conclusions and the limitations posed by one day of data. Finally, Figure 1 appears to show a higher correlation between GPP and PAR than between GPP and NIRvrad – therefore significantly undercutting the authors main claim in this section – that NIRvrad is an appropriate proxy for GPP over short temporal scales. To me, this section would be better off as a discussion of how NIRvrad in fact does **not** sufficiently capture diurnal variability in GPP – and moreso reflects changes in PAR. I also recommend the authors provide a bit of additional commentary on why the other VIs show low correlations with GPP data.
  - Thank you for the suggestion for added clarity and purpose. We address the limitations of using one day of data throughout the manuscript, specifically in lines 488; 490-492, 534-538, 704-706, 735-737. Throughout the manuscript we have made changes to carefully state that there is greater potential for NIRvrad as a proxy for GPP compared to the reflectance-based vegetation indicators (indices). The reflectance-based indicators, NDVI, EVI, NIRv, and FCVI, have been shown to trend seasonally with GPP in most biomes, but by virtue of calculating reflectances, these omit short timescale changes in incoming, scattered, and reflected radiation. NIRvrad, in contrast to reflectance-based indicators, includes the incoming, scattered, and reflected radiation in the NIR region. For this reason, recent studies (e.g. Wu et al 2020) and our study are pointing to the potential of NIRvrad to trend with GPP on short timescales through a joint relationship between NIRvrad, PAR and GPP. We have added more text in the introduction, results, discussion and conclusion, to address of this for clarity, lines 192-195, 506-509, 532-540, 866-869, and 954-955.
- The authors repeatedly draw the conclusion that presented VI data is suitable for separating out the physiological from the structural component of the SIF signal when SIF measurements are available. However, the authors are not presenting SIF data and therefore not substantiating this claim with sufficient results or appropriate citations. Specific comments are included in specific examples. I feel that much of the SIF discussion in fact takes away from the authors main conclusions and novelty of their other results as it focuses the discussion on what they aren't doing (normalizing SIF with VI data). In particular, the majority of the introduction focuses on SIF. I recommend the authors cut down on this discussion significantly and make it more clear what conclusions they are drawing from their results vs. potential directions for future work.
  - The authors appreciate these suggestions regarding the overemphasis on SIF in the discussion and introduction. Based on this thoughtful review, we

have modified the manuscript extensively to focus the introduction on the quantities measured in the study and minimize the text and references to SIF and how the quantities may relate to SIF. Specifically, we removed almost all of Lines 52-101 from the original submission. We maintained mentioning SIF in the Introduction only as the studies presented compared NIRv, FCVI, or NIRvrad specifically to GPP and SIF (Lines 193-201), and in the Results and Discussion (Lines 729-731) and Conclusion (Lines 865-869) to make comparisons between measurement techniques for reflectance-based indices and SIF as well as emphasizing how this study might be relevant to SIF, which is an emerging, important potential measurement of GPP.

### Specifics:

- Lines 16-18: The statement ‘presented here for the first time’ is a bit misleading since you are not presenting these VI’s for the first time, you’re presenting them at this specific field site for the first time. Additionally, this opening does not make it clear the scientific question or problem you are trying to address or appropriate background information.
  - Thank you for assisting with clearer wording for this part of the abstract. We have removed the phrase “presented here for the first time” and modified the text (lines 16-23, 593-596) to clarify the purpose of the study. We see that the previous phrasing suggested the vegetation indicators were presented for the first time, when we only intended to point out these indicators specifically from UAV data are novel.
- Line 38: Unoccupied might be a more appropriate term, as presumably the UAS was piloted (just not with someone on board).
  - We have updated to use the term ‘unoccupied’, as it is more appropriate (Lines 24 and 59).
- Line 57: ‘SIF is mechanistically linked to photosynthesis of plants, and thereby, has also been shown to be more sensitive to changes in forest canopy function and structure than RIs’ – this deserves a citation. I also don’t think you can say it’s more sensitive to changes in forest canopy structure (although function yes). See the following for comparisons between SIF and VI’s (among others):
  - Cheng, R., Magney, T. S., Dutta, D., Bowling, D. R., Logan, B. A., Burns, S. P., Blanken, P. D., Grossmann, K., Lopez, S., Richardson, A. D., Stutz, J., & Frankenberg, C. (2020). Decomposing reflectance spectra to track gross primary production in a subalpine evergreen forest. *Biogeosciences*, 17(18), 4523–4544. <https://doi.org/10.5194/bg-17-4523-2020>
  - Magney, T. S., Bowling, D. R., Logan, B. A., Grossmann, K., Stutz, J., Blanken, P. D., Burns, S. P., Cheng, R., Garcia, M. A., Köstler, P., Lopez, S., Parazoo, N. C., Raczka, B., Schimel, D., & Frankenberg, C. (2019). Mechanistic evidence for tracking the seasonality of photosynthesis with solar-induced fluorescence. *Proceedings of the National Academy of Sciences of the United States of America*, 116(24), 11640–11645. <https://doi.org/10.1073/pnas.1900278116>

- Pierrat, Z., Nehemy, M. F., Roy, A., Magney, T., Parazoo, C., Laroque, C., Pappas, C., Sonntag, O., Bowling, D. R., Seibt, U., Ramirez, A., Helgason, W., Barr, A., & Stutz, J. (2021). Tower-based remote sensing reveals mechanisms behind a two-phased spring transition in a mixed-species boreal forest. *Journal of Geophysical Research: Biogeosciences*. <https://doi.org/10.1029/2020JG006191>.
  - Thank you for this comment. Based on this and the earlier suggestions, this portion of the manuscript was removed and portions of the manuscript referring to SIF significantly more focused on how the vegetation indicators measured related specifically to SIF. These references, however are valuable for our future work and are greatly appreciated.
- Line 87-89: It's worth mentioning which ecosystem types because this is not true across all ecosystems/some types show much better performance than others. The citations you have all have ecosystem type information.
  - We have updated this text to include the ecosystem or coverage of data, i.e., global, from the literature. This portion now appears in lines 82-84, but portions of the paragraph after these lines has also been updated to include more specifics (Line 85, Lines 88-92, Lines 94-98),
- Lines 99-101: Again it's worth mentioning ecosystem type here (ie: specifically tropical in your case) – this doesn't necessarily apply for all ecosystems/we don't have enough studies testing this across varied vegetation cover.
  - Thank you for pointing out this omission. We have now included text to clarify the data used in previous studies, which helps us highlight the tropical forest on which we focused (lines 94-98).
- Lines 111-113: This deserves a citation (or several).
  - Thank you for pointing out this ambiguous statement. We have removed references to using the emerging indices to potentially separate the SIF signal into physiological and physical components, as we did not test this. As a part of this process, this particular phrase was removed.
- Line 124: The introduction deserves some final statement about the broader aims of this work. What ultimate goal this information provides.
  - Thank you for this suggestion. We added a sentence at the beginning of the last paragraph of the introduction (Lines 99-104) to state the broader aims.
- Line 146: there's a period . typo after 12 ms.
  - Thank you, this error has been corrected (Line 129).
- Line 160: As mentioned above there should be additional discussion on the limitations of only one day of data.
  - Thank you for reminder here. We have addressed this in lines 488; 490-492, 534-538, 704-706, 735-737.
- Line 173: I believe the original citation for NDVI is:

- Tucker, C. J. (1979). Red and photographic infrared linear combinations for monitoring vegetation. *Remote Sensing of Environment*, 8(2), 127–150.  
[https://doi.org/10.1016/0034-4257\(79\)90013-0](https://doi.org/10.1016/0034-4257(79)90013-0).
  - Thank you for pointing out this oversight, we have inserted this citation (Line 158).

- Figure 1: There appears to be some sort of accidental grid to the side of panel d?

Thank you for catching our oversight. The figure has been corrected (Now Fig. 2, Line 218).

- Lines 236-238: ‘Our results demonstrate that UAS-based data are suitable for normalizing SIF at high spatial resolution in addition to recording structural heterogeneity of a tropical forest’ – your results don’t really demonstrate this because you don’t have SIF data. Maybe if you say they have ‘the potential’ however I still think this distracts here from the other findings.
  - Thank you, we agree and we have removed this reference to normalizing SIF and focused this portion of the manuscript on NIRv, FCVI, and NIRvrad instead (Lines 229-234).
- Line 239: ‘Because NIRv and NIRvrad use NDVI, these results also indicate that including NIR reflectance or NIR radiance is the largest contributing factor to this variability’ – This is built into the definitions of NIRv and NIRvrad so I would rephrase this to reflect that.
  - Thank you. Lines 233-234 have been updated to clarify this point.
- Lines 250-251: rephrase for clarity to ‘The low variability and high means at midday of NIRv, FCVI, and NIRvrad indicate that...’ T
  - These lines, now Lines 247-250 have been revised to make this point more clearly. Thank you for suggesting a change in wording here.
- Line 266: ‘strong peak’ is a bit of an overstatement, it seems much more rounded to me.
  - Thank you, we have rephrased to “distinct” to avoid overstating the shape of the peak (Line 262).
- Line 277: remove ‘note how’.
  - We have removed this part of the sentence (Line 272).
- Lines 286-297: This discussion of SIF is much better because it acknowledges the potential, but also notes that SIF measurements are not available. This however also deserves some citations.
  - Thank you. We have included the appropriate citations for this statement in the revised version (Lines 290-298).
- Line 313: Remove ‘for the first time’ – it’s confusing as you’re not presenting new indices, you’re presenting new data at this particular location.

- Thank you, we removed this from that line (now Line 315), and created a new sentence (Lines 315-316) to clarify that we think we are the first to use such high spatial resolution data of NIRv, FCVI, and NIRvrad (from UAS). Based on this helpful suggestion, we think this more correctly asserts the claim.
- Line 317: I do not believe you can draw this conclusion with one day of data (see my major concern above).
  - We appreciate this suggestion and we re-worded this sentence (now Lines 317-318) to discuss the potential, as well as throughout the manuscript.
- Lines 334-337: SIF discussion here is distracting from your main points.
  - We see this now and agree. We have removed references to SIF and SIF disaggregation from the conclusions.
- Lines 345-346: You do not show that these measurements can be used to separate the components of a SIF signal and you're also not really showing how to use it as an estimate of fPAR, APAR, or GPP. Also worth noting this is for a tropical ecosystem.
  - We have also removed these and updated this portion of the manuscript to reflect this helpful advice. Instead, we discuss the importance of future work using these vegetation indicators in tropical ecosystems and beyond to explore vegetation structure and function (Lines 337-344).

- **General Comments**

- The authors present a very interesting and novel dataset of high-resolution vegetation indices (VI) in a tropical forest. They present correlations of the VIs to the gross primary productivity (GPP) of this forest and show how the VIs compare in capturing GPP for a given day. The authors also present a comparison of the VIs in their ability to capture structural heterogeneity of the forest. I found the study to be relevant and current given the emerging VIs used in this study. The spatial component of this study is very interesting as well. Here the authors show that NIRv and FCVI can capture more spatial heterogeneity in this forest in the reflection and absorption of radiation. My comments mostly focus on encouraging enhancement of the discussion that could provide more context for the analysis that was done and reducing the discussion of distracting concepts that were not tested. To tie the introduction and discussion to the analysis and results, the discussion and the introduction could better explain why NIRv\_rad would be correlated to GPP with a clearer explanation of the GPP and NIRv (reflectance or radiance based) relationship and a reduced discussion of the role of the VIs in the SIF-GPP relationship. The paper could benefit from discussing the connections between canopy structure (height, size of tree clusters) and function (GPP) rather than the links between VIs and SIF. Below are some specific comments.

- **Specific comments**

- The Light-Use Efficiency (LUE) model is the most widely used model to explain the relationship between GPP and vegetation indices such as NDVI as mentioned by the authors in line 42. I find the description of the LUE model to be inadequate in this paper considering it plays such a key role in understanding why vegetation indices correlate with GPP. Thinking of NIRv as an indicator of  $fPAR \times f_{esc}$  could serve an analysis which includes observed SIF, but for the current analysis, it would be better to discuss NIRv\_rad as an indicator for APAR. I would encourage the authors to present either: the equation for the LUE model with an explanation of the terms or a written description of the LUE logic and a description of its terms. Medlyn (1998) and Yuan et al. (2014) provide overviews of the LUE model and its terms. Presenting the LUE model can help readers understand exactly where vegetation indices fit in estimating GPP when one does not have SIF observations and would help clarify vague sentences like “thus a joint relationship between a remote sensing vegetation quantity, PAR, and GPP.” (lines 206 – 207)
  - This insight is particularly helpful to clarify our message for the readers. We have updated the manuscript to remove the emphasis on  $fPAR \times f_{esc}$  and to include information about the links to LUE (Lines 58-62). Additionally, based on this comment, others by this reviewer, and those made by other reviewers, we have significantly cut the introductory material related to the SIF~GPP~vegetation indicator descriptions and links because we did not measure SIF. We feel as if this provided a clearer background for our study focusing on traditional RS vegetation indicators and emerging indicators.

- Since the study focuses solely on vegetation indices, can the authors expand more on why near-infrared reflectance or reflected near-infrared radiation and the vegetation indices that are built from it have shown good correlations with GPP?
  - We fine-tuned the introduction to the vegetation indicators and GPP to provide links, especially based on previous studies in Lines 62-70. We follow this portion of the manuscript with a careful description of the traditional and emerging vegetation indicators without pulling in tertiary information not related to what we are testing, such as SIF. We feel this now provides a better basis for our study.
- Making a clearer link between spatial canopy heterogeneity and GPP in the discussion can also help tie both the correlation and the power spectrum analysis together.
  - Thank you for this suggestion. We have updated the introduction, results and discussion to include better links between canopy spatial heterogeneity and GPP Lines 38-44, 49-55, 228-234, 289-297.
- I find the discussion of SIF here to be a bit too extensive given that SIF was not actually tested. The authors have covered an important point in mentioning the use of NIRv to capture the structural component of observed SIF and it is worth mentioning in a sentence or two, but I think an analysis which is not focused on a comparison between SIF and VIs does not need to explain how VIs are related to SIF as extensively as has been done. Instead, a focus on how near-infrared reflectance of vegetation, canopy structure, and light capture/absorption is related to GPP could help address the actual comparison being made. If the authors want to focus on how NIRv can be used in the GPP-SIF relationship, then the links between NIRv, SIF, and GPP need to be discussed further to allow a reader to understand what role NIRv plays in estimating GPP through the GPP-SIF relationship. Expanding the  $fPAR \times f_{esc}$  equation to show the full GPP equation could help in this area. However, again, since the NIRv-GPP relationship was tested, the LUE model without SIF is a better conceptual glue for this analysis.
  - Thank you for these helpful and very detailed suggestions. Based on this reviewer's perspective, we updated the manuscript, especially the introduction, to increase the focus on NIRv, FCVI, and NIRvrad and reduce the focus on SIF. Specifically, we removed paragraph 2 from the introduction, as well as extraneous references to SIF in Paragraph 3 (Lines 52-101). We only retained a reference to SIF in regard to comparing techniques for measurement (Lines 78-81), measurements of FCVI in our study related to SIF (Lines 88-90), studies specifically comparing the vegetation indices to GPP and SIF (Line 96), and in the discussion regarding uses for emerging vegetation indices (Lines 295-296 and 316-319).
- Line 113: Can the authors expand on why NIRv needs to serve as a proxy for SIF if it can serve as a proxy for GPP and a radiance based NIRv can serve as a proxy for APAR? Using NIRv for addressing the structural component of the SIF-GPP relationship makes sense, but the utility of using NIRv as a proxy for SIF is not as clear.



- We agree that stressing the connection between NIRv, NIRvrad, and SIF takes away from the central message that these metrics from UAS provide fine-scale structural information that may help address gaps in understanding GPP. Based on this helpful suggestion, we have scaled back references to SIF, and specifically removed the references in Line 113.
- R in equation 3 and equation 4 is not explained until after equation 5. It can be clearer to explain what R represents after equation 3 and 4.
  - Apologies for this oversight. We have now corrected this omission (Lines 158-161).
- It is unclear how this analysis supports the claim at line 236 since normalizing SIF with the UAS data was not done in this study.
  - Thank you, we have removed this reference to normalizing SIF as a part of focusing the manuscript more clearly on NIRv, FCVI, and NIRvrad (Lines 230).
- Claims made at the following lines need citations: line 32 – 33, lines 56 – 57, lines 75 – 76, lines 78 – 80, lines 91 – 94
  - We added appropriate citations for lines 32-33 (now Lines 41-42). Due to modifications related to decreasing the discussions of SIF in the introduction, Lines 52-101 were removed from the manuscript. Thank you for pointing out these omissions.

#### • Technical Corrections

- Line 49 – 50: consider changing “and questions linger about their ability to track green-up with RIs in tropical regions” to “and questions linger about the ability to track green-up with RIs in tropical regions” or “and questions linger about their ability to track green-up in tropical regions”
  - Thank you for this helpful suggestion, we have reworded according to your advice (lines 49-53).
- Line 84: consider changing “SIF signal or used to independently as” to “SIF signal or used independently as”.
  - This is a helpful suggestion, but this sentence has been removed in this revision.

#### References

Medlyn, B. E.: Physiological basis of the light use efficiency model, *Tree Physiology*, 18, 167–176, <https://doi.org/10.1093/treephys/18.3.167>, 1998.

Yuan, W., Cai, W., Xia, J., Chen, J., Liu, S., Dong, W., Merbold, L., Law, B., Arain, A., Beringer, J., Bernhofer, C., Black, A., Blanken, P. D., Cescatti, A., Chen, Y., Francois, L., Gianelle, D., Janssens, I. A., Jung, M., Kato, T., Kiely, G., Liu, D., Marcolla, B., Montagnani, L., Raschi, A., Rouspard, O., Varlagin, A., and Wohlfahrt, G.: Global comparison of light use

efficiency models for simulating terrestrial vegetation gross primary production based on the LaThuile database, *Agricultural and Forest Meteorology*, 192–193, 108–120, <https://doi.org/10.1016/j.agrformet.2014.03.007>, 2014.

Thank you for bringing these references to our attention. We have corrected this omission and included the information and appropriate references (Lines 59, 61, 68, 556-557, 671-676).

# Unveiling spatial and temporal heterogeneity of a tropical forest canopy using high-resolution NIRv, FCVI, and NIRvrad from UAS observations

Trina Merrick<sup>1,4,8\*</sup>, Stephanie Pau<sup>1</sup>, Matteo Detto<sup>2,3</sup>, Eben N. Broadbent<sup>4</sup>, Stephanie A. Bohlman<sup>2,5</sup>, Christopher J. Still<sup>6</sup>, Angelica M. Almeyda Zambrano<sup>7</sup>

<sup>1</sup> Department of Geography, Florida State University, 113 Collegiate Loop, Tallahassee, Florida 32306, USA

<sup>2</sup> Smithsonian Tropical Research Institute, Apartado 0843–03092, Balboa, Ancon, Panama

<sup>3</sup> Department of Ecology and Evolutionary Biology, Princeton University, Princeton, New Jersey 08544 USA

<sup>4</sup> Spatial Ecology and Conservation Lab, [School of Forest, Fisheries and Geomatics Sciences](#), University of Florida, Gainesville, FL, 32608 USA

<sup>5</sup> [School of Forest, Fisheries and Geomatics Sciences](#), University of Florida, Gainesville, FL, 32608 USA

<sup>6</sup> Department of Forest Ecosystems and Society, Oregon State University, Corvallis, Oregon 97331 USA

<sup>7</sup> Spatial Ecology and Conservation Lab, Center for Latin American Studies, University of Florida, Gainesville, Florida 32608 USA

<sup>8</sup> [Naval Research Laboratory, Remote Sensing Division, 4555 Overlook Ave. SW, Washington, DC, 20375, USA](#)

*[\\*Author's current location](#)*

Correspondence to: Trina Merrick ([trina.merrick@nrl.navy.mil](mailto:trina.merrick@nrl.navy.mil))

**Abstract.** [Recently, remotely-sensed measurements of the near-infrared reflectance \(NIRv\) of vegetation, the fluorescence correction vegetation index \(FCVI\), and radiance \(NIRvrad\) of vegetation, have emerged as indicators of vegetation structure and function with potential to enhance or improve upon commonly used indicators, such as the normalized difference vegetation index \(NDVI\) and the enhanced vegetation index \(EVI\). The applicability of these remotely sensed indices to tropical forests, key ecosystems for global carbon and biodiversity, have been limited. In particular, fine-scale spatial and temporal heterogeneity of structure and physiology may contribute to variation in these indices and the properties, such as gross primary productivity \(GPP\) and absorbed photosynthetically active radiation \(APAR\), that are presumed to be measured by these indices. In this study, fine-scale \(15cm and greater\) tropical forest heterogeneity represented by NIRv, FCVI, and NIRvrad, is investigated using unoccupied aerial systems \(UAS\) data, and compared to NDVI, EVI, and Lidar.](#) By exploiting near-infrared signals, emerging vegetation indicators captured the greatest spatiotemporal variability, followed by the enhanced vegetation index (EVI), then the normalized difference vegetation index (NDVI). Wavelet analyses showed the dominant spatial [scale of](#) variability of all indicators is driven by tree clusters and larger-than-tree-crown size gaps [rather than](#) individual tree crowns. Emerging indices and EVI captured [variability](#) at smaller spatial scales (~50 m) than NDVI (~90 m) and lidar (~70 m). [We show](#) that [spatial and temporal patterns of](#) NIRv and FCVI are virtually identical for a dense green canopy, [confirming predictions in earlier studies](#). Furthermore, we show that NIRvrad, which does not require separate irradiance measurements, correlated [more](#) strongly with [GPP](#) and [PAR than did other indicators](#). These emerging indicators, which are related to canopy structure and the radiation regime of vegetation canopies, are promising tools to improve understanding of tropical forest canopy structure and function.

## 37 1 Introduction

38 Important spatial and temporal heterogeneity in structurally complex and species-rich tropical forests are not  
39 well characterized. Many factors, including varying microclimate, light conditions, topography, crown structure, and  
40 patterns of tree mortality and regeneration, contribute to high heterogeneity that underlies coarse scale gross primary  
41 production (GPP) measurements in tropical forest (e.g., Xu et al., 2015; Guan et al., 2015; Morton et al., 2014;  
42 Bohlman and Pacala, 2012; Laurance et al., 2012; Clark et al., 2008; Huete et al., 2008). Improving knowledge of  
43 tropical forest dynamics at multiple scales is crucial to monitoring and predicting resilience of tropical ecosystems  
44 and productivity under climate change (Liu et al., 2021; Clark et al., 2017; Laurance et al., 2012; Malhi, 2012; Wright,  
45 2010; Saatchi et al., 2010; Lewis et al., 2009). Remote sensing (RS) measurements have been employed to uncover  
46 vegetation patterns of structure and productivity from local to global scales, often with a focus on filling gaps in  
47 knowledge regarding variation and uncertainties in GPP estimates (e.g., Jung et al., 2011; Glenn et al., 2008; Huete et  
48 al., 2002; Ryu et al., 2018; Yang et al., 2017; Jiang et al., 2008; Zhao et al., 2010; Heinsch et al., 2006; Running et al.,  
49 2004; Turner et al., 2003). Yet, there is a spatial mismatch between satellite data (e.g., 30 m to 1 km pixel resolution),  
50 which provides observations across large extents at repeat intervals, and site-specific plot level data (e.g., 0.1 – 1  
51 hectare) that contributes to uncertainties in GPP estimates (Gelybó et al., 2013; Zhang et al., 2020). There is a lack of  
52 high spatial and temporal resolution data that can capture fine-grained heterogeneity of tropical forests (Clark et al.,  
53 2017; Mitchard, 2018; Saatchi et al., 2011; Lewis et al., 2009). Unoccupied aerial systems (UAS) with hyperspectral  
54 imaging sensors present an opportunity to collect tropical forest canopy data at high spatial resolution, which could  
55 address unknowns related to the high heterogeneity of tropical forests.

56 Traditional reflectance-based indices (RI) using RS data, such as the normalized difference vegetation index  
57 (NDVI) and enhanced vegetation index (EVI), are known to capture structural changes that are coincident with  
58 changes in GPP. RIs have provided optical methods using RS to track GPP via the light use efficiency (LUE) model  
59 (J.L. Monteith, 1977; Yuan et al., 2014; B. E. Medlyn, 1998). In the most commonly used formulation of the LUE  
60 model for RS, GPP is the product of the absorbed photosynthetically active radiation (APAR) and the efficiency ( $\epsilon$ )  
61 with which the target vegetation converts the radiation to carbon (Gamon, 2015; Yuan et al., 2014; Running et al.,  
62 2004). APAR is derived from the incoming photosynthetically active radiation (PAR) times the fraction of PAR  
63 (fPAR). RIs commonly used in the LUE model of GPP as well as direct proxies for GPP are NDVI and EVI, because  
64 of a strong relationship to fPAR (Springer et al., 2017; Morton et al., 2015; Gamon et al., 2015; Porcar-Castell et al.,  
65 2014; Glenn et al., 2008; Gao et al., 2007; Huete et al., 2002; Zarco-Tejada et al., 2013). NDVI and EVI are typically  
66 used as proxies on seasonal timescales, or, when used to examine changes on shorter timescales, they have been  
67 multiplied by photosynthetically active radiation (PAR) to account for changes in radiation (incoming, absorbed, and  
68 scattered) which better align with GPP changes (Springer et al., 2017; Yuan et al., 2014). However, RIs alone have  
69 often not shown enough sensitivity to capture more fine-scale or rapid changes in vegetation, such as those in tropical  
70 forests, and questions linger about the ability to track green-up with RIs in tropical regions (Liu et al., 2021; Yang et  
71 al., 2018a; Lee et al., 2013; Xu et al., 2015; Morton et al., 2014; Samanta et al., 2010; Sims et al., 2008).

72 Recently, three emerging vegetation indicators have been shown to track with GPP more closely than traditional  
73 RIs. These indicators are the near-infrared reflectance of vegetation (NIRv) (Badgley et al., 2017), the fluorescence

74 correction vegetation index (FCVI) (Yang et al., 2020) and the near-infrared radiance of vegetation (NIRvrad) (Wu et  
75 al., 2020). Because they exploit additional information from the NIR region of the spectrum, NIRv, FCVI, and  
76 NIRvrad do not saturate in dense canopies or suffer the same level of contamination from senesced vegetation and  
77 soils as traditional RIs (Baldocchi et al., 2020; Badgley et al., 2017). Additionally, these emerging indicators require  
78 only moderate spectral resolution data and are similarly straightforward to measure and calculate as RIs, making them  
79 accessible in a broad range of studies. In contrast, SIF measurements require very high spectral resolution and multiple  
80 instruments. Therefore, NIRv, FCVI, and NIRvrad could be employed as valuable indicators of canopy structure and  
81 function (Badgley et al., 2019; Badgley et al., 2017; Dechant et al., 2020) and have practical advantages over making  
82 SIF measurements.

83 NIRv, the product of NDVI and the near-infrared reflectance (NIR), from moderate spectral resolution  
84 satellite imagery and field spectrometers has been shown to empirically track measured and modelled GPP globally  
85 (with highest uncertainties in the tropics) at monthly to seasonal timescales, presumably because changes in canopy  
86 phenology influence light capture and these changes coincide with changes in GPP (Badgley et al., 2019; Badgley et  
87 al., 2017; Dechant et al., 2020). FCVI, derived from radiative transfer theory rather than an empirical relationship, is  
88 calculated from RS data by subtracting the reflectance in the NIR from the reflectance in the visible range (Yang et  
89 al., 2020). Yang et al. (2020) demonstrated that FCVI, by capturing structure and radiation information from a  
90 vegetated canopy, tracked GPP and solar-induced fluorescence (SIF; a radiance-based indicator of GPP) in field  
91 experiments with crops and in numerical experiments. Yet FCVI showed differences from NIRv due to exposed soil  
92 within the vegetated study areas. In previous studies, FCVI and NIRv were similar for dense green canopies where  
93 soils have less of an impact, but this has not yet been tested in the tropics (Wang et al., 2020; Badgley et al., 2019;  
94 Dechant et al., 2020). NIRvrad was proposed as a proxy for GPP on half-hourly and daily timescales, in contrast to  
95 NIRv and FCVI which track changes on longer timescales (Wu et al., 2020; Dechant et al., 2020; Baldocchi et al.,  
96 2020; Zeng et al., 2019). NIRvrad is calculated by multiplying NDVI by the NIR radiance, and because the radiance  
97 of NIR accounts for incoming radiation at short timescales, has tracked GPP and SIF on half-hourly and diurnal scales  
98 as well as seasonally in crops and, to a limited extent, natural grass and savanna ecosystems. (Dechant et al., 2020;  
99 Baldocchi et al., 2020; Zeng et al., 2019; Wu et al., 2020).

100 Readily available UAS-based hyperspectral sensors are capable of robust measurements of NIRv, FCVI, and  
101 NIRvrad at ultra-high spatial scales, i.e. in tens of centimeters. In this regard, UAS-based data have the potential to  
102 improve our understanding of tropical forest structure and function over a range of scales that are poorly resolved by  
103 other RS platforms. Here, we use high spatial resolution UAS measurements to characterize spatial and temporal  
104 variation in a semi-deciduous tropical forest canopy during the dry season, and compare commonly used spectral  
105 indices (NDVI and EVI) to newer vegetation indicators (NIRv, NIRvrad, and FCVI) by (i) examining correlations  
106 between GPP and vegetation indicators using mean values across the canopy throughout the day, (ii) evaluating the  
107 distribution of fine spatial resolution values (~15 cm) across the canopy and examining changes in this spatial variation  
108 throughout the course of two days, and finally (iii) identifying the dominant spatial scale driving variation across our  
109 10 ha study region.

## 110 2 Materials and Methods

### 111 2.1 Study Area

112 Barro Colorado Island (BCI), Panama, is a 1560 ha island (approximately 15 km<sup>2</sup>) in Gatun Lake, which was formed  
113 by the construction of the Panama Canal. The Smithsonian Tropical Research Institute manages the preserved area  
114 specifically for research. This semi-deciduous moist tropical forest receives approximately 2640 mm mean annual  
115 precipitation and has a mean temperature of 26°C with a dry season from approximately January through April (Detto  
116 et al., 2018). There is high species diversity, with approximately 500 tree species, approximately 60 species per ha,  
117 and about 6.3% of trees at >30cm diameter at breast height (dbh) (Bohman and O'Brien, 2006; Condit et al., 2000).  
118 The UAS and ground measurements were focused on an area approximately 10 ha within the footprint of an eddy  
119 covariance tower near the center of the island (9.156440°, -79.848210°).

### 120 2.2 Data collection

121 The GatorEye Unmanned Flying Laboratory is a hardware and software system built for sensor fusion  
122 applications, and which includes hyperspectral, thermal, and visual cameras and a Lidar sensor, coupled with a  
123 differential GNSS, internal hard drives, computing systems, and an Inertial Motion Unit (IMU). Hardware and  
124 processing details, as well as data downloads, are available at [www.gatoreye.org](http://www.gatoreye.org). The GatorEye flew 13 missions on  
125 January 30 and 31, 2019 over the forest canopy within the eddy covariance tower footprint at an average height of 120  
126 m above ground level (AGL) and at 12 m/s (Fig. 1). In this study, we used radiometrically calibrated flight transects  
127 from the Nano VNIR 270 spectral band hyperspectral sensor (Headwall Photonics, Fitchburg, MA, USA) which  
128 covered approximately 1 ha per flight within the EC footprint in this study. The Nano spectrally samples at  
129 approximately 2.2 nm and 12-bit radiometric resolution from 400 to 1050 nm. The frame rate was set to 100 fps, with  
130 an integration time of 12 ms and provided a pixel resolution of approximately 15x15 cm. The Nano was calibrated to  
131 radiance by the manufacturer before the field campaign and pixel drift was removed by dark images collection, which  
132 was corrected for during the conversion from digital number to radiance. The hyperspectral transects were equally  
133 subset for each flight in ENVI + IDL (Harris Geospatial, Boulder, CO). Each flight resulted in 1920 transects of  
134 approximately 400 m length composing three blocks discretized in 2500 data points. Simultaneous lidar was collected  
135 using a VLP-32c ultra puck (Velodyne, San Jose, CA), which was processed to a 0.5x0.5 m resolution digital surface  
136 model (DSM).

137 Turbulent fluxes and meteorological variables were measured from a 40 m Eddy Covariance (EC) flux tower  
138 (Fig. 1). The eddy covariance system includes a sonic anemometer (CSAT3, Campbell Scientific, Logan, UT) and an  
139 open-path infrared CO<sub>2</sub>/H<sub>2</sub>O gas analyzer (LI7500, LiCOR, Lincoln, NE). High-frequency (10Hz) measurements  
140 were acquired by a datalogger (CR1000, Campbell Scientific) and stored on a local PC. Other measurements made at  
141 the tower include air temperature and relative humidity (HC2S3, Rotronic, Hauppauge New York), and  
142 photosynthetically active radiation (PAR; BF5, Delta-T Devices, UK). EC data were processed with a custom program  
143 using a standard routine described in Detto et al. (2010). GPP was derived from daytime values of NEE by adding the  
144 corresponding mean daily ecosystem respiration obtained as the intercept of the light response curve (Lasslop et al.,

2010). [Due to a power issue, data corresponding to the January 30 flights was not collected, so only January 30 GPP were available.](#)

An HH2 Pro Spectroradiometer (HH2; ASD/Panalytical/Malvern, Boulder, CO) fitted with a diffuse cosine receptor was used on the ground in full sun at the forest edge to record incoming irradiance on January 30 and 31, 2019 (~ 3nm FWHM and spectral sampling at 1nm). HH2 irradiance was resampled to match the Nano hyperspectral sensor and used to calculate reflectance. A calibrated reference tarp was placed in full sun at the forest edge and the UAS flew over and recorded the tarp each UAS flight. Reflectance was calculated separately using the HH2 and tarp data and resulting reflectance values compared as a method to vicariously cross-calibrate reflectance from the hyperspectral data (<7.0% difference for all data in the study). In addition, PAR was calculated with the HH2 data and compared to the tower-mounted PAR measurement (approximately 1.5 km apart) to help understand any differences in the sky conditions during flight times. PAR differences across the site for each flight time for the duration of flights (approximately 10-15 minutes in length each) ranged between 4.0% and 10.3%. [A summary of materials and methods is provided in Fig.1 at the end of Section 2.](#)

### 2.3 Vegetation indicators

We calculated NDVI and EVI as ([Tucker, 1979](#); Huete et al., 2002; Rouse [JR](#) et al., 1974):

$$NDVI = \frac{R_{770-800} - R_{630-670}}{R_{770-800} + R_{630-670}} \quad (3)$$

and

$$EVI = \frac{2.5(R_{770-800} - R_{630-670})}{R_{770-800} + 6 \times R_{630-670} - 6 \times R_{460-475} + 1} \quad (4)$$

where [R is reflectance and the subscripts indicate wavelengths. Here,](#) we used the averages of 770-800 nm for NIR, 630-670 nm for red [reflectance](#), and 460-475 nm for blue bands reflectance and normalized to reduce noise.

We [further](#) calculated the near-infrared vegetation index NIRv as:

$$NIRv = NDVI \times R_{770-800} \quad (5)$$

where R770-800 is the NIR reflectance ([Badgley et al., 2017](#)). The fluorescence correction vegetation index (FCVI) was calculated from spectral data by subtracting the reflectance in the visible range (R400-700) from the NIR reflectance ([Yang et al., 2020](#)) as follows

$$FCVI = R_{770-800} - R_{400-700} \quad (6).$$

The near-infrared radiance of vegetation (NIRvrad) was calculated similarly to the NIRv, except NDVI was multiplied by the radiance, rather than reflectance, from the NIR region (Rad770-800) ([Wu et al., 2020](#)) as follows:

$$NIRvrad = NDVI \times Rad_{770-800} \quad (7).$$

### 2.4 Data Analysis

We examined mean values across the canopy over the course of one day by creating [a diurnal time series of scatterplots of](#) the tower-based PAR data, tower-based GPP data, and means of all spectral vegetation indicators, on

173 Jan 31, 2019, and ran comparisons using Pearson’s correlation coefficients to examine correlations. At fine spatial  
 174 scales, i.e. pixel level of ~15 cm, we created density plots, calculated the coefficient of variation (CV), and calculated  
 175 the means of all vegetation indicators (NDVI, EVI, NIRv, FCVI, NIRvrad) for each flight to compare spatial and  
 176 temporal variability (Fig. 1). To determine which spatial scales dominate the variability of each vegetation quantity,  
 177 we ran power spectrum wavelet analysis using code created in the Matlab programming language (Mathworks, Natick,  
 178 Massachusetts). For each vegetation quantity and each flight, and for the lidar elevation model representing canopy  
 179 height, we computed the Morlet wavelet power spectrum of individual transects (Torrence and Compo, 1998). All  
 180 power spectra from the wavelet analysis were normalized to unit variance. An ensemble power spectrum for each  
 181 vegetation indicator was created by averaging across all the transects of each flight and then across flights. We then  
 182 compared the power spectra for each vegetation indicator and lidar data to compare the spatial scales at which the  
 183 quantities captured variability as well as the spatial scale at which the lidar-based elevation model captured variability.  
 184 For illustration purposes, Fig. S3 is an example of two signals, a higher and lower noise signal created with fractals  
 185 (Signal A and B, respectively, Fig. A1) and the corresponding power spectra which decay differently at smaller spatial  
 186 scales (Power Spectra, Fig. A1). Initial UAS data processing was carried out in Interactive Data Language (IDL) and  
 187 Environment for Visualizing Images (ENVI) (Harris Geospatial, Boulder, CO). Other analysis, including graphical  
 188 illustrations, were carried out using the R open source environment with libraries dplyr, ggplot, and tidyverse (R  
 189 Development Core Team, 2010; Wickham et al., 2018; Wickham, 2017, 2016) and Matlab (Mathworks, Natick,  
 190 Massachusetts).

191

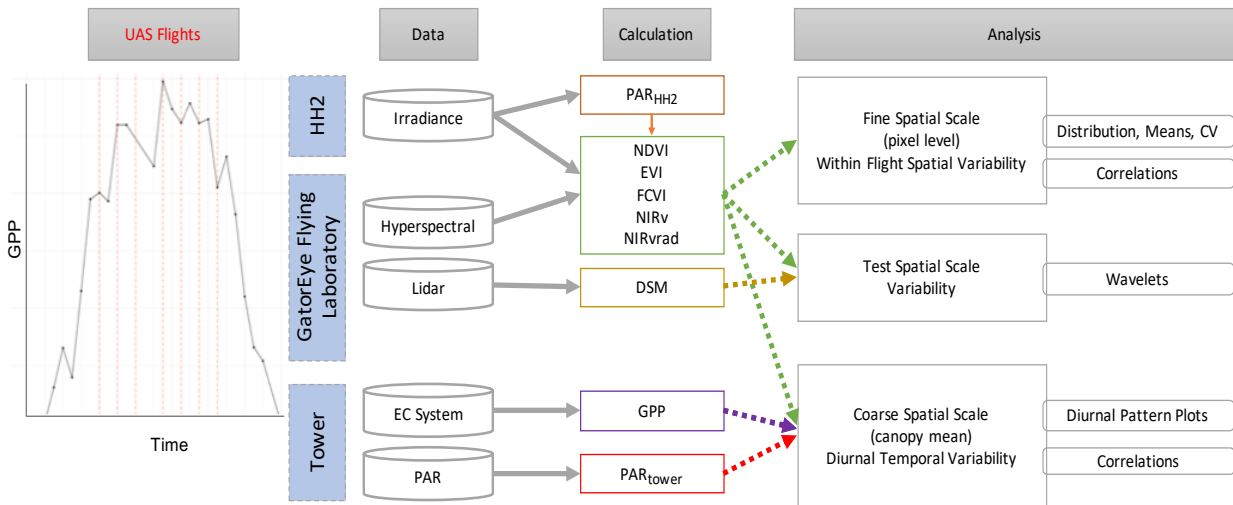

192

193 **Figure 1.** Summary of methods. **Concept of diurnal GPP and UAS flights (far left).** Platforms and instrumentation (blue)  
 194 consisted of the Analytical Spectral Devices (ASD) Handheld Spectroradiometer Pro 2 (HH2), the GatorEye Flying  
 195 Laboratory, and the Tower at Barro Colorado Island (BCI). Data collected included Irradiance, Hyperspectral, Lidar,  
 196 Eddy Covariance System (EC), and Photosynthetically Active Radiation (PAR). Calculations made were PAR with the HH2  
 197 (PAR<sub>HH2</sub>), the Normalized Difference Vegetation Index (NDVI), Enhanced Vegetation Index (EVI), Fluorescence  
 198 Correction Vegetation Index (FCVI), the Near Infrared Vegetation Index (NIRv), the Near Infrared Radiance of Vegetation  
 199 (NIRvrad), the Digital Surface Model (DSM), Gross Primary Productivity (GPP) and PAR from the PAR Sensor on the  
 200 Tower (PAR<sub>tower</sub>). An overview of the data analysis at each scale is provided in the right of the diagram.



## 201 3 Results and discussion

### 202 3.1 Diurnal trend in spectral vegetation indicators, PAR, and GPP

203 The degree to which remote sensing vegetation indicators represent changes in GPP depend largely on canopy  
204 structure-dependent light absorption and scattering processes, that is, a joint relationship between a remote sensing  
205 vegetation quantity, PAR or APAR, and GPP. Fig. 2 shows GPP, PAR, and the mean value of each vegetation quantity  
206 at each flight time over the course of January 31, the day on which we had overlapping data between the UAS and  
207 eddy covariance system (Fig. 2a-d). Additionally, Pearson correlation coefficients among mean NIRv, FCVI,  
208 NIRvrad, EVI, and NDVI for each flight time and the GPP and PAR values at the flight times are shown in Fig. 2d.  
209 NIRv is significantly and strongly positively correlated to both FCVI ( $r=0.9$ ,  $p<0.001$ ) and EVI ( $r=0.9$ ,  $p<0.01$ ).  
210 NIRvrad is the only vegetation quantity with a significant correlation to PAR and GPP, with a strong positive  
211 relationship (0.9 and 0.81, respectively, p-values  $<0.05$ ; Fig. 2d). Mean NIRvrad values also have the greatest relative  
212 diurnal change among the vegetation indicators (Fig. 2c and d). These results demonstrate that a shared correlation of  
213 NIRvrad and GPP to PAR results in mean NIRvrad tracking diurnal changes in GPP to a greater degree than NIRv,  
214 FCVI, NDVI or EVI, because NIRvrad takes incoming radiation into account whereas the other vegetation indicators  
215 do not. This evidence – albeit based on only one day of data – supports the proposed use of NIRvrad as a proxy for  
216 changes in GPP on short timescales. NIRvrad is also a more efficient measurement of GPP in the sense that a separate  
217 instrument to measure PAR is not needed (Wu et al., 2020; Zeng et al., 2019). Given that the relationship between  
218 NIRvrad and GPP depends on PAR, it is unclear if the association between NIRvrad and GPP would weaken during  
219 the wet season when low light or diffuse light conditions are more common (Berry and Goldsmith, 2020).

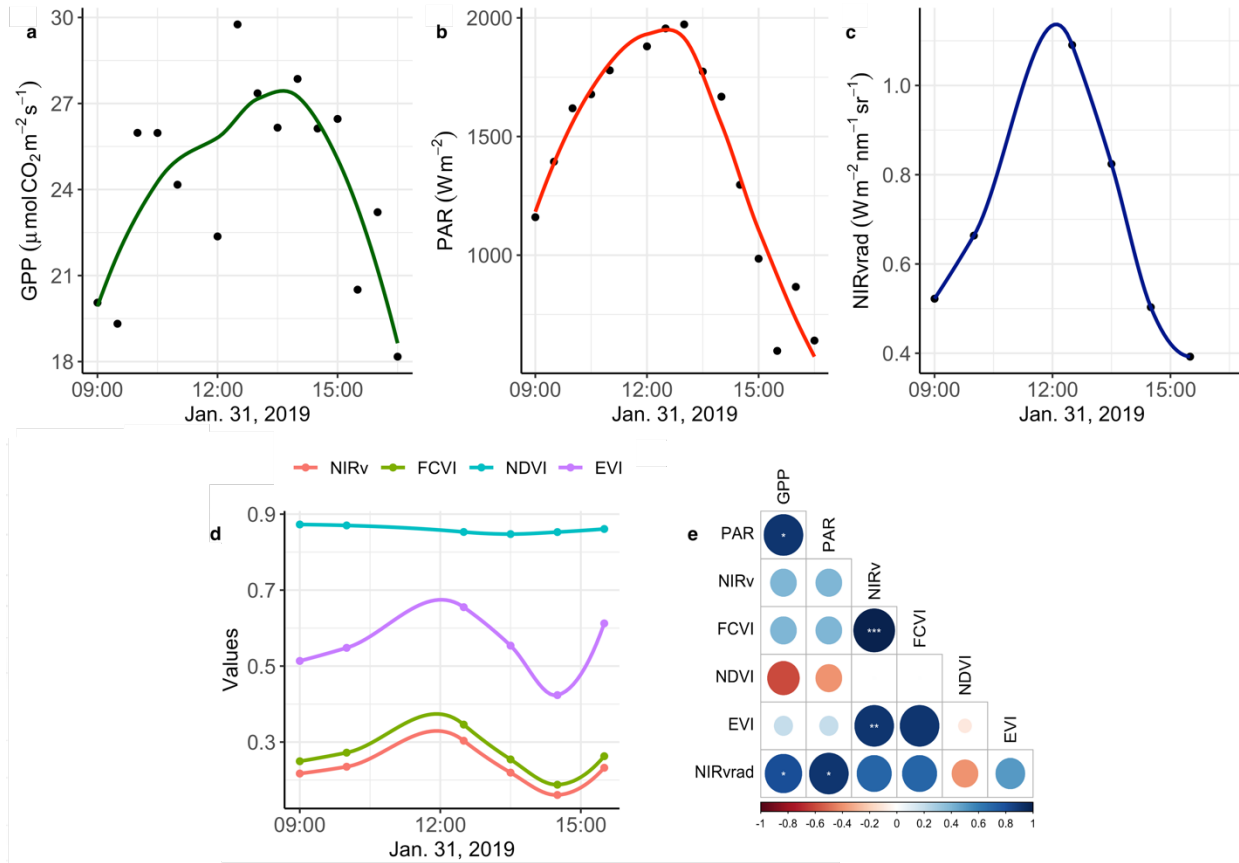

**Fig. 2.** Diurnal time series of a) GPP b) PAR c) NIRvrad d) NIRv, FCVI, NDVI, and EVI e) comparisons of quantities using Pearson correlations color indicates strength of relationship, \* =  $p$ -value<0.05, \*\* =  $p$ -value <0.01, \*\*\* =  $p$ -value <0.001.

### 3.2 Tropical forest canopy variation

Spatial distributions and CV of all pixels of NIRv, FCVI, and NIRvrad are generally similar to one another and show considerable variation spatially across the canopy and temporally over the course of a day and across days (Fig. 3a-c, Table A2). NIRv, FCVI, and NIRvrad distributions are distinct from EVI and NDVI (Fig. 3a-e, Table A2, and Table A2). NIRv, FCVI, and NIRvrad have the highest CV at each flight time (between 39.78% and 91.54%, Table A1), followed by EVI (between 20.24% and 37.24%, Table A2) and NDVI varied the least at any flight time (between 9.83% and 12.82%, Table A2). For some indices, mean values across the canopy fail to capture extreme high (NIRv, NIRvrad, and FCVI) or low values (NDVI) during morning and afternoon hours. This pattern suggests “hot” and “cool” spots of activity related to heterogeneity in forest structure and low sun angles. In previous studies, the directional effects on NIRv have been examined on coarse spatial scales (i.e. satellites) and have been proposed as a means of improving understanding of NIRv agreement to GPP (Hao et al., 2021; Dechant et al., 2020; Baldocchi et al., 2020; Zhang et al., 2020). Our results demonstrate that NIRv, FCVI, and NIRvrad capture fine-grained heterogeneity of this tropical forest canopy, which was obscured by EVI and NDVI (Fig. 3a-e). NIRv and NIRvrad use NDVI, thus, by definition, NIR is the largest contributing factor to the heterogeneity captured (Fig. 3a, c, and e). While NIRv and NIRvrad distributions are generally similar, they diverge in the afternoons when PAR declines, which likely why NIRvrad is better correlated with GPP. EVI variability was higher than NDVI variability, but lower than

239 that of NIRv, FCVI, and NIRvrad, indicating that EVI has a different level of sensitivity to viewing geometry and  
240 canopy components (potentially understory), light absorption and scattering regime of the canopy than the other  
241 indices (Table A1 and Table A2). We also show empirically that NIRv and FCVI are virtually the same in a dense  
242 tropical forest presumably due to both indices similarly representing the radiation regime of the tropical forest canopy,  
243 i.e. light capture and scattering, in conditions with little background soil, supporting the predictions of earlier studies  
244 (Dechant et al., 2020; Zeng et al., 2019; Yang et al., 2018b; Wu et al., 2020).

245 Midday distributions of NIRv, FCVI, and NIRvrad on Jan. 30 at 12:00 and 1330 and Jan. 31 at 12:30 are less  
246 skewed than at other times of the day whereas morning and afternoon distributions are skewed toward lower values,  
247 except for Jan. 31 at 15:30 (Fig. 3a-c). On both days, when mean values peak at midday, the variation for all vegetation  
248 indicators is lowest (Jan 30, 1200 CV between 47.6 and 49.2 and Jan 31, 1230 CV between 45.6 and 47.2) (Fig. 3,  
249 Table A1). The highest variability occurred in the afternoon on both days (Jan 30, 1630 CV between 91.3% and 91.5  
250 and Jan 31, 1430 CV between 83.3% and 83.8% for all quantities) (Fig. 3, Table A2). At midday, NIRv, FCVI, and  
251 NIRvrad variability was low and means were high, indicating that viewing and sun geometry drive the higher and  
252 lower values during morning and afternoon. This effect is greater in the afternoon than the morning (Fig. 3, Table  
253 A2). However, a different pattern is apparent on Jan. 31 during the 1530 flight time when mean values increased from  
254 the 1430 flight time means and the CV values were the lowest of any flight observations in the study and this influence  
255 appears to be greatest on EVI. It is possible that this was due to another type of effect on illumination geometry, such  
256 as wind influencing the UAS, diffuse radiation effects, or hotspot effects.

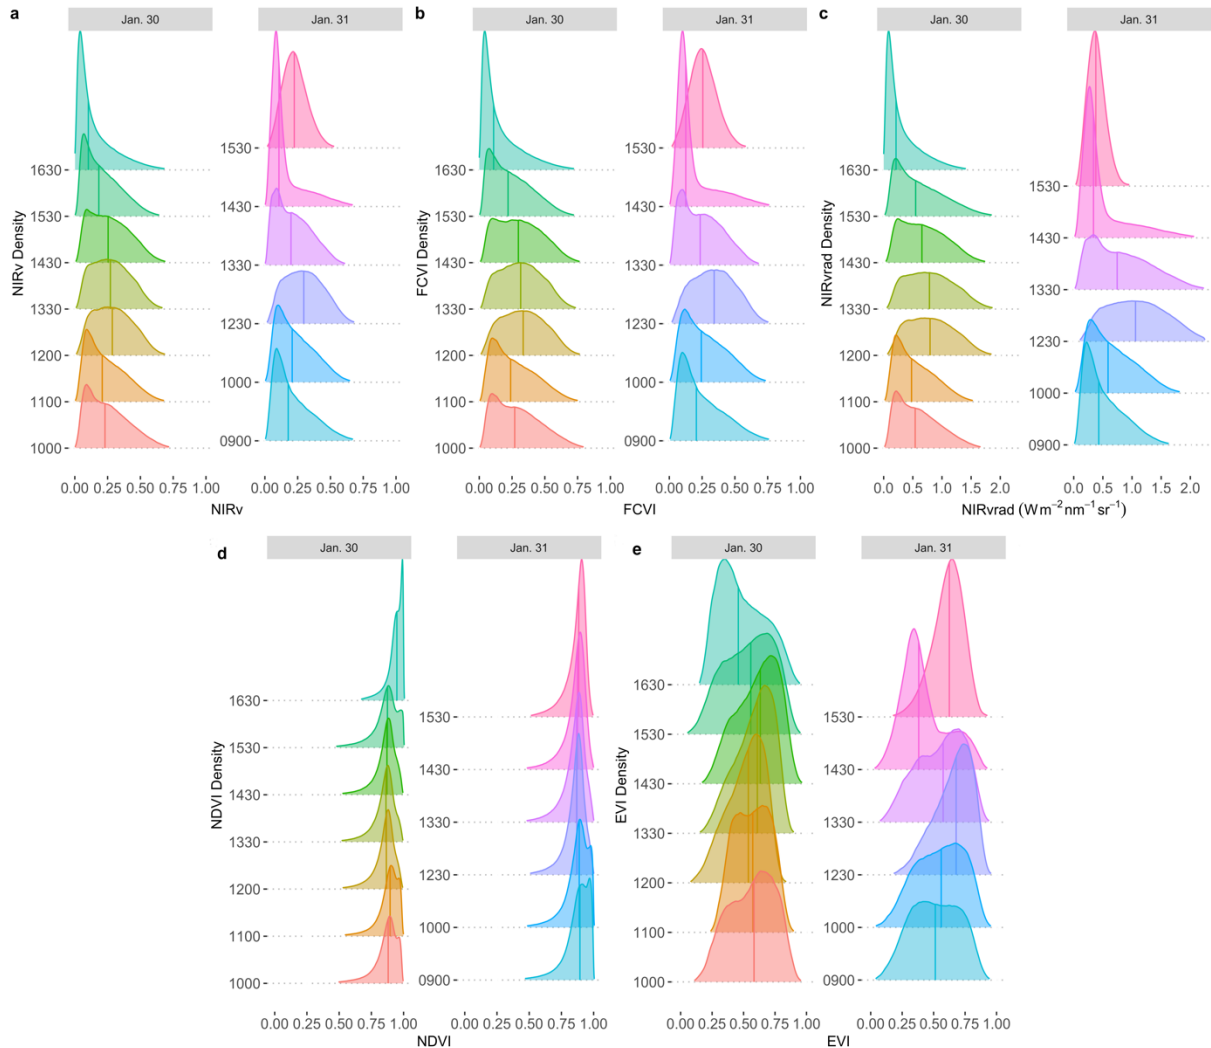

257  
 258 **Fig. 3.** NIRv (a), FCVI (b), and NIRrad (c) density plots for each flight time on January 30, 2019 (column 1 each panel)  
 259 and January 31 (column 2 each panel). Colours of distributions indicate the flight time and day.

260 **3.3 Power Spectrum Analysis**

261 Power spectrum analysis was used to identify the dominant spatial scales driving variability across the canopy  
 262 (Fig. 4). In Fig. 4, the area beneath the curve is proportional to the variance because it is the spectrum divided by the  
 263 corresponding scale and then plotted as a function of the log of the scale (example signals and power spectra provided  
 264 Fig. A1). Similar to their spatial distributions (Fig. 3), NIRrad and FCVI are indistinguishable in their dominant  
 265 scales of spatial variability (Fig. 3) (Dechant et al., 2020; Zeng et al., 2019). Power spectrum analysis shows a distinct  
 266 peak around 50 m spatial scale for NIRv, NIRrad, FCVI, and EVI, whereas NDVI peaks at approximately 90 m. The  
 267 largest tree crown sizes on BCI are on the order of 20-30 m in diameter and the most common crown sizes are between  
 268 4-10 m (Fig. A2). Thus, the spatial variability of the vegetation indicators is strongly influenced by larger forest  
 269 structures, such as forest gaps and tree clusters, rather than individual tree crowns.

270 This larger scale of variability is also confirmed by the power spectrum of the lidar-derived canopy surface  
 271 model, which displays a peak at 70 m scale, indicating that larger than tree crown scales produce the most variability

272 in canopy height. In other words, UAS-based lidar data also show that canopy heights within a 70 m spatial scale  
273 create strong spatial features on the landscape. Vegetation indicators and the lidar canopy surface model appear less  
274 effective at capturing smaller scale differences within a canopy (leaves or leaf clumps) or among the most frequent  
275 tree crown sizes on BCI (4-10 m sunlit tree crown sizes determined by stereophotos; Fig. A2). However, the peaks in  
276 the vegetation indicators are broader than the peak in the lidar data, showing that smaller features of the canopy are  
277 still contributing to the total spatial signal in the power spectra. These results suggest that satellite data with a spatial  
278 resolution greater than ~50 m may miss important variation in diverse tropical forest canopies. NDVI displays a  
279 different shape with a slower decay at small scales, indicating less distinguishable spatial structures from the canopy,  
280 and a peak shifted to the larger scales (Fig. 4), i.e. NDVI does not distinguish smaller spatial structures. At much larger  
281 scales (>100-200 m), the vegetation indicators decline smoothly, while NDVI and especially lidar show an increase  
282 in variance probably associated with topographic heterogeneity.

283 One reason why vegetation indicators and LiDAR captured variability at spatial scales larger than the most  
284 common tree crown sizes on BCI is that canopy heights tend to be more uniform on BCI compared to other tropical  
285 forests, possibly due to wind (Bohlman and O'Brien, 2006). For example, Dipterocarpus dominated South-East Asian  
286 forests have emergent trees, unlike BCI, which can reach up to 60 m in height. Additionally, tree crowns on BCI tend  
287 to be more flat-topped than conical or rounded, and trees can be found clumped in similar heights, which could explain  
288 why the most often detected unit is larger than the mean of a single crown. On the other end of the spectrum, forest  
289 gaps can be larger than a single crown because treefall often affects neighbouring trees.

290 Vegetation indicators and the Lidar-derived surface model represent the spectral and structural properties most  
291 broadly of the upper canopy, and thus it is conceivable that they display similar spatial variability. However, NIRv,  
292 FCVI, NIRvrad, and EVI discriminated details at a different spatial scale from NDVI and LiDAR. These results  
293 parallel the variability detected in their distributions (Fig. 3 and Table A1), where NDVI patterns were distinct from  
294 the other vegetation indicators. Taken together, these results show that NIRv, FCVI, and NIRvrad have a smoother  
295 spatial pattern and peak at finer scales than NDVI, which is known to saturate at high green biomass (Zhu and Liu,  
296 2015; Huete et al., 2002), whereas the emerging vegetation indicators should better correlate with aspects of  
297 photosynthetic capacity. Thus, these emerging indicators should measure finer resolution spatial heterogeneity and  
298 should be more adept at monitoring changes in structure and function of the canopy than NDVI. Additionally, the  
299 emerging indicators can potentially disaggregate the physiological and structural component of SIF when SIF  
300 measurements are available since changes in structure of the forest coincide with changes in GPP (Wang et al., 2020;  
301 Wu et al., 2020; Yang et al., 2020; Dechant et al., 2020). Emerging indicators' heightened ability to differentiate the  
302 fine-scale spatial variability in the canopy is likely due to the influence of high upwelling of NIR from the canopy and  
303 understory, particularly in the dry season, which tend to blur the signal of the upper canopy for NDVI. Notably, EVI  
304 and NDVI, two common indicators of vegetation greenness, show differences in their power spectrum, in particular  
305 the slope of the curve for scales less than 20 m. EVI was designed to better capture vegetation changes by exploiting  
306 variability in the reflectance in the blue range, especially effective in dense green canopies. This may help explain the  
307 scale of variability in this canopy where variation in the blue may be expected to manifest, especially because

308 deciduous crowns, which have high reflectance in blue wavelengths compared to fully leaved crowns, are present on  
309 BCI.  
310

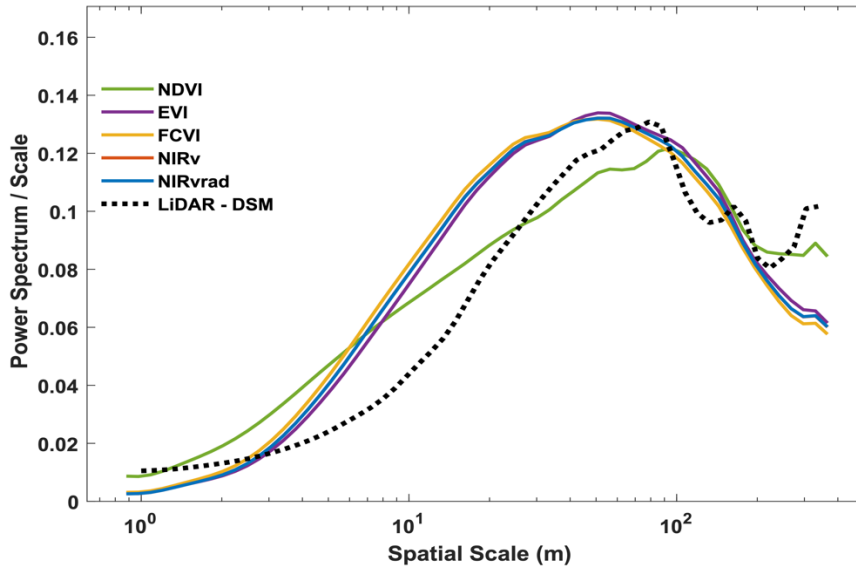

311  
312 **Fig. 4.** Ensemble wavelet power spectra for all the quantities used in this study and a LiDAR-derived digital  
313 surface model (DSM). Note that FCVI and NIRv are similar, thus the NIRv curve is obscured by the FCVI.  
314 Ensembles were created by averaging the spectrum of individual transects, then averaging across flights. Note  
315 that in this representation, the spectrum divided by the corresponding scale as a function of the log of the scale,  
316 the area beneath the curve is proportional to the variance.

#### 317 4 Conclusions

318 We examined NIRv, FCVI, and NIRvrad, emerging vegetation indicators related to fPAR and the scattering of  
319 SIF photons, of a semi-deciduous tropical forest canopy using UAS-based hyperspectral data. Our findings  
320 demonstrate that NIRvrad has greater potential to track GPP over the course of a day than the non-radiance-based  
321 indices as evidenced by a shared correlation among NIRvrad, PAR, and GPP. Thus NIRvrad is a potential proxy for  
322 tracking GPP on short timescales without the need for separate measurements of incoming irradiance, which SIF  
323 requires. Also, NIRv, FCVI, and NIRvrad at high spatial resolution (~15cm) unveil greater spatial and diurnal  
324 variability of BCI's tropical forest canopy versus EVI or NDVI, which may pave the way to improve our understanding  
325 of the relationship between GPP and remote sensing observations. The dominant scale driving spatial variability of  
326 spectral measurements and lidar data are larger forest structures occurring on BCI, such as groups of similar trees or  
327 forest gaps. Yet, smaller, broader peaks in the power spectra of NIRv, FCVI, NIRvrad, and EVI indicate these four  
328 indices incorporate smaller scale information compared to NDVI. Taken together, the demonstrated potential to track  
329 GPP, measure spatial heterogeneity and variability, and capture forest structural characteristics of BCI open greater  
330 possibilities to examine structure and function within and across this tropical forest.

331 Because remote sensing advancements are making it possible to capture physiological responses of vegetation,  
332 the importance of improved techniques to examine the radiation regime, for instance estimating fPAR or APAR, can  
333 be overlooked. However, recent studies have highlighted the importance and difficulties of measuring fPAR and  
334 APAR, the strong dependence of measurements on illumination and viewing geometry, as well as the need for  
335 increased understanding of structure-related radiation regime information more generally e.g. (Hao et al., 2021;  
336 Dechant et al., 2020; Baldocchi et al., 2020; Rocha et al., 2021; Zhang et al., 2020). For NIRv, FCVI, and NIRvrad,  
337 inclusion of the NIR spectral region makes the emerging indices more sensitive to incoming, absorbed, and scattered  
338 radiation, which can be influenced by illumination and viewing geometry, changes in canopy leaf angles or associated  
339 structure changes. In the case of NIRvrad, which was most strongly associated with GPP, changes in light regime and  
340 associated photosynthetic capacity can even be captured diurnally. This study highlights the importance of  
341 understanding the incoming solar radiation, absorbed and scattered radiation, and illumination and viewing geometry  
342 of any remote sensing data, but it also encourages exploiting RS observations to improve our ability to measure  
343 structure-related light capture and scattering patterns. It is in this role, we show these measurements should be further  
344 investigated as valuable tools to improve our understanding of complex tropical forest canopies and potentially as an  
345 improved estimate of fPAR, APAR, or GPP. While this study focuses on BCI, these techniques could be applied more  
346 broadly for the purposes of defining the dominant scale of spatial variability, tracking structural changes, monitoring  
347 coincident changes in GPP or light regime, or as inputs to vegetation models of tropical forest structure and function.

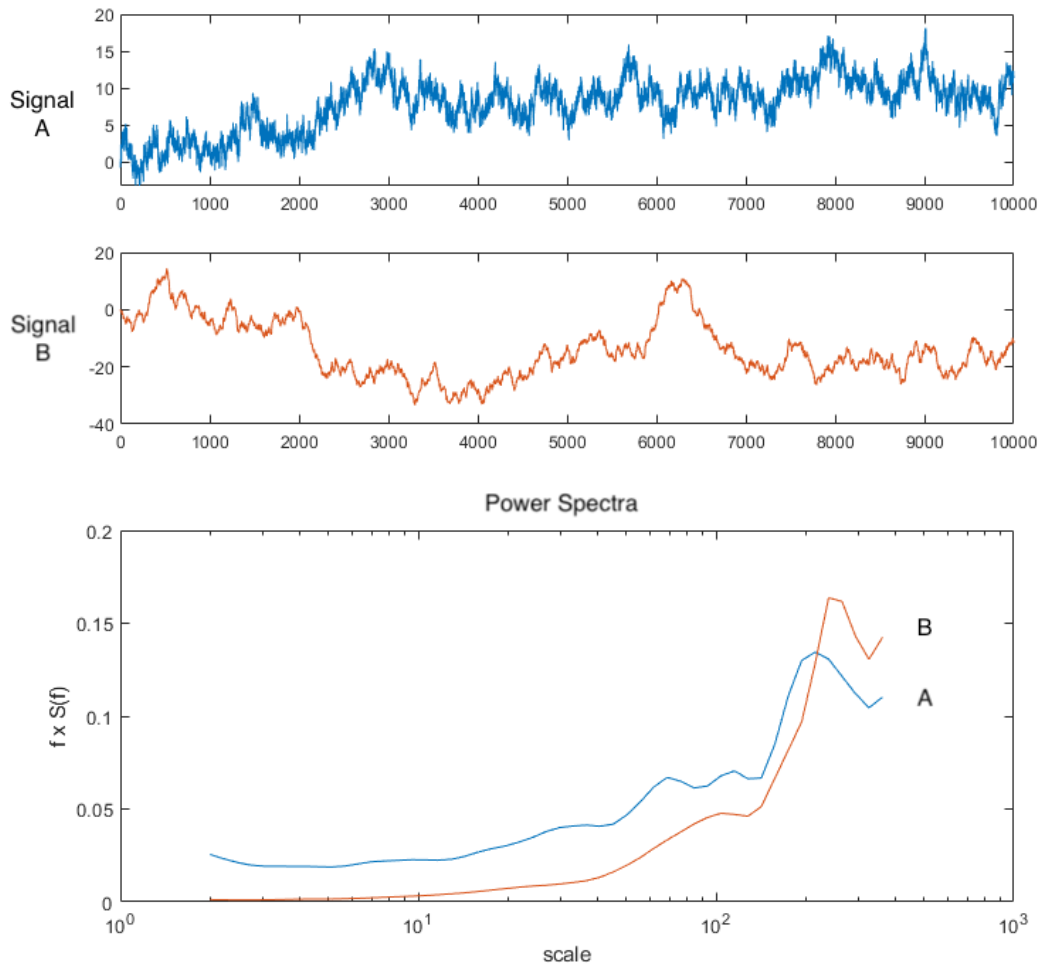

349

350 **Figure A1.** Sample signals with relatively higher noise (Signal A) and lower noise (Signal B) and their corresponding  
 351 Power Spectra ensemble plotted as normalized on log scale. Note the representation of the variance by area under the curve  
 352 is preserved by multiplying the Power ( $S(f)$ ) by the frequency ( $f$ ). In this way the area beneath the curve is still proportional  
 353 to the variance.

354



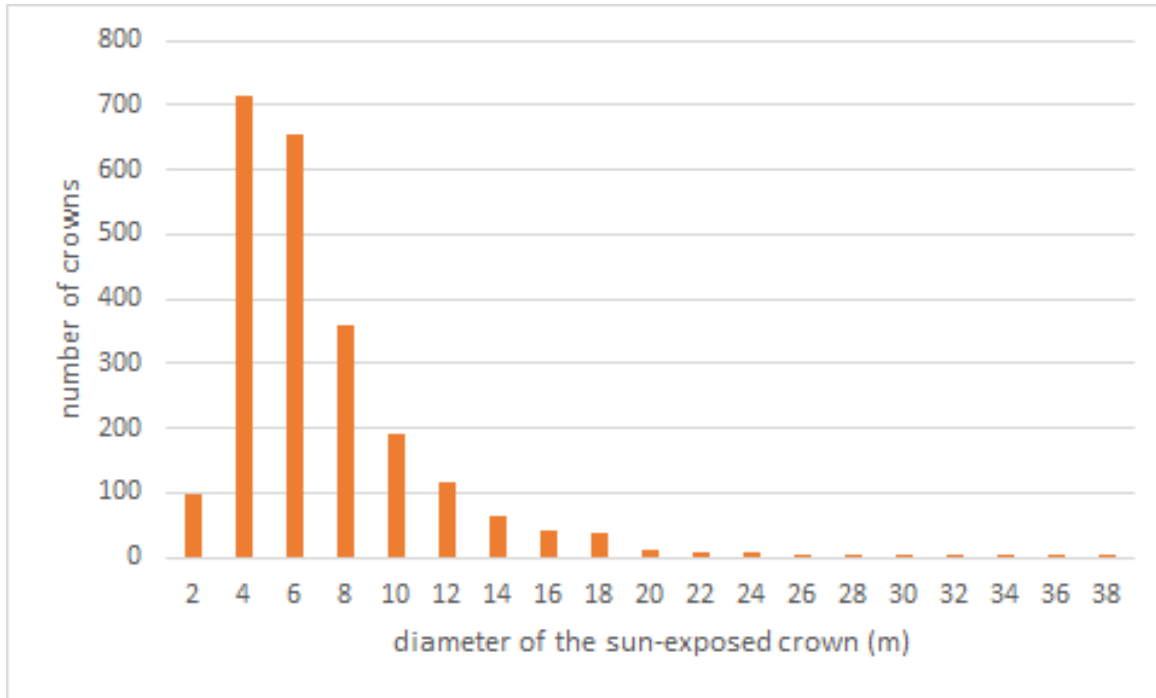

355

356

357

358

**Figure A2.** Distribution of tree crown sizes on BCI in a sample ~10 ha plot taken from digitized high spatial resolution stereo photos that were linked to stems in the field (Bohlman and Pacala 2012). This ~10 ha plot does not coincide with the ~10 ha area sampled by the UAS near the eddy covariance tower in this study.

359

360

361

**Table A1.** Mean, standard deviation (Sdev) and coefficient of variation (CV) of NIRv, NIRvrad, and FCVI measurements for the study.

362

| Flight Time | Mean NIRv | SDev NIRv | CV NIRv (%) | Mean NIRvrad | SDev NIRvrad | CV NIRvrad (%) | Mean FCVI | SDev FCVI | CV FCVI (%) |
|-------------|-----------|-----------|-------------|--------------|--------------|----------------|-----------|-----------|-------------|
| Jan30_1000  | 0.26      | 0.16      | 61.36       | 0.60         | 0.36         | 60.54          | 0.29      | 0.18      | 59.69       |
| Jan30_1100  | 0.24      | 0.15      | 61.48       | 0.54         | 0.33         | 60.56          | 0.27      | 0.16      | 60.89       |
| Jan30_1200  | 0.29      | 0.15      | 49.20       | 0.82         | 0.39         | 47.59          | 0.34      | 0.16      | 47.88       |
| Jan30_1330  | 0.28      | 0.14      | 50.46       | 0.81         | 0.40         | 49.24          | 0.32      | 0.16      | 49.16       |
| Jan30_1430  | 0.27      | 0.15      | 55.46       | 0.70         | 0.38         | 54.38          | 0.31      | 0.17      | 54.22       |
| Jan30_1530  | 0.21      | 0.14      | 65.10       | 0.63         | 0.41         | 64.71          | 0.25      | 0.16      | 64.01       |
| Jan30_1630  | 0.16      | 0.14      | 91.54       | 0.32         | 0.30         | 91.54          | 0.17      | 0.15      | 91.39       |
| Jan31_0900  | 0.22      | 0.14      | 66.31       | 0.52         | 0.34         | 65.25          | 0.25      | 0.16      | 66.01       |
| Jan31_1000  | 0.24      | 0.14      | 59.43       | 0.66         | 0.39         | 58.29          | 0.27      | 0.16      | 59.04       |
| Jan31_1230  | 0.30      | 0.14      | 47.17       | 1.09         | 0.50         | 45.63          | 0.35      | 0.16      | 45.91       |
| Jan31_1330  | 0.22      | 0.14      | 61.91       | 0.82         | 0.51         | 61.47          | 0.25      | 0.15      | 60.53       |
| Jan31_1430  | 0.16      | 0.14      | 85.32       | 0.50         | 0.42         | 83.81          | 0.19      | 0.16      | 83.83       |

|            |      |      |      |      |      |       |      |      |      |
|------------|------|------|------|------|------|-------|------|------|------|
| Jan31_1530 | 0.86 | 0.08 | 9.83 | 0.61 | 0.12 | 20.24 | 0.53 | 0.04 | 8.15 |
|------------|------|------|------|------|------|-------|------|------|------|

363  
364  
365

**Table A2. Mean, standard deviation (Sdev) and coefficient of variation (CV) of NDVI and EVI measurements for the study.**

| Flight Time | Mean NDVI | SDev NDVI | CV NDVI (%) | Mean EVI | SDev EVI | CV EVI (%) |
|-------------|-----------|-----------|-------------|----------|----------|------------|
| Jan30_1000  | 0.86      | 0.10      | 11.64       | 0.57     | 0.18     | 31.54      |
| Jan30_1100  | 0.88      | 0.09      | 10.15       | 0.57     | 0.14     | 24.40      |
| Jan30_1200  | 0.85      | 0.09      | 10.38       | 0.52     | 0.15     | 28.48      |
| Jan30_1330  | 0.85      | 0.09      | 10.60       | 0.59     | 0.15     | 25.24      |
| Jan30_1430  | 0.85      | 0.09      | 10.35       | 0.61     | 0.16     | 26.84      |
| Jan30_1530  | 0.85      | 0.11      | 12.52       | 0.54     | 0.19     | 35.21      |
| Jan30_1630  | 0.93      | 0.06      | 6.69        | 0.49     | 0.18     | 36.90      |
| Jan31_0900  | 0.87      | 0.10      | 11.54       | 0.51     | 0.19     | 37.24      |
| Jan31_1000  | 0.87      | 0.10      | 11.08       | 0.55     | 0.19     | 34.66      |
| Jan31_1230  | 0.85      | 0.08      | 9.82        | 0.66     | 0.15     | 22.72      |
| Jan31_1330  | 0.85      | 0.09      | 10.70       | 0.55     | 0.19     | 33.80      |
| Jan31_1430  | 0.85      | 0.09      | 10.58       | 0.42     | 0.18     | 43.07      |
| Jan31_1530  | 0.86      | 0.08      | 9.83        | 0.61     | 0.12     | 20.24      |

366  
367  
368  
369  
370

371 ***Code availability***

372 ***Data availability***

373 GatorEye data related to this project can be downloaded from [www.gatoreye.org](http://www.gatoreye.org). Code and other material  
374 with links provided upon request (repository forthcoming).

375

376 ***Author contributions***

377 T.M. designed the study with the help of S.P. and S.A.B.. M.D. and T.M. outfitted the tower and collected tower-  
378 based data, T.M. and E.N.B. collected the UAS data. E.N.B., A.M.A.Z., and T.M. pre-processed the hyperspectral and  
379 lidar data. T.M. and M.D. further processed UAV, lidar, and GPP data and ran data analysis. M.D., S.P., S.A.B., C.S.,  
380 contributed with the methodological framework, data processing analysis and write up T.M., M.D., S.P., S.A.B., C.S.,

381 E.N.B., and A.M.A.Z. contributed to the interpretation, quality control and revisions of the manuscript. All authors  
382 read and approved the final version of the manuscript.

### 383 ***Competing interests***

384 The authors declare no conflict of interest.

### 385 ***Acknowledgments***

386 Support for this project, including portions of field logistic and data collection costs and materials, and  
387 support for T.M., was provided by the Provost's Postdoctoral Fellows Program at Florida State University. E.N.B.  
388 was supported through the School of Forest, [Fisheries and Geomatics Sciences](#), A.M.A.Z through the Center for Latin  
389 American Studies, and hardware, software, and system costs associated with the GatorEye and data collection were  
390 provided through the McIntire Stennis Program of the USDA and the School of Forest, [Fisheries and Geomatics](#)  
391 [Sciences](#). M.D. was supported by the Carbon Mitigation Initiative at Princeton University. The authors wish to thank  
392 the vast support of the collaborators, staff, and researchers at the Smithsonian Tropical Research Institute and,  
393 specifically at Barro Colorado Island, without which this research would not be possible. Among other contributors  
394 to the work, we also extend special thanks to Alfonso Zambrano, Carli Merrick, Riley Fortier, and Pete Kerby-Miller  
395 for field work assistance, and Dr. S. Joseph Wright and Dr. Helene Muller-Landau for support on site as well.

396

### 397 **References**

- 398 Alonso, L., Moreno, J., Moya, I., and R. Miller, J. R.: A Comparison of Different Techniques for Passive Measurement  
399 of Vegetation Photosynthetic Activity: Solar-Induced Fluorescence, Red-Edge Reflectance Structure and  
400 Photochemical Reflectance Indices, *IEEE*, 3, 2003.
- 401 Alonso, L., Gómez-Chova, L., Vila-Francés, J., Amorós-López, J., Guanter, L., Calpe, J., and Moreno, J.: Sensitivity  
402 analysis of the Fraunhofer Line Discrimination method for the measurement of chlorophyll fluorescence using a field  
403 spectroradiometer, *IEEE*, 4, 2007.
- 404 Alonso, L., Gómez-Chova, L., Vila-Francés, J., Amorós-López, J., Guanter, L., Calpe, J., and Moreno, J.: Improved  
405 Fraunhofer Line Discrimination Method for Vegetation Fluorescence Quantification, *IEEE GEOSCIENCE AND*  
406 *REMOTE SENSING LETTERS*, 5, 5, 2008.
- 407 Badgley, G., Field, C. B., and Berry, J. A.: Canopy near-infrared reflectance and terrestrial photosynthesis, *Sci Adv*,  
408 3, e1602244, [10.1126/sciadv.1602244](https://doi.org/10.1126/sciadv.1602244), 2017.
- 409 Badgley, G., Anderegg, L. D. L., Berry, J. A., and Field, C. B.: Terrestrial gross primary production: Using NIRV to  
410 scale from site to globe, *Glob Chang Biol*, 25, 3731-3740, [10.1111/gcb.14729](https://doi.org/10.1111/gcb.14729), 2019.
- 411 Baldocchi, D. D., Ryu, Y., Dechant, B., Eichelmann, E., Hemes, K., Ma, S., Rey Sanchez, C., Shortt, R., Szutu, D.,  
412 Valach, A., Verfaillie, J., Badgley, G., Zeng, Y., and Berry, J. A.: Outgoing Near Infrared Radiation from Vegetation  
413 Scales with Canopy Photosynthesis Across a Spectrum of Function, Structure, Physiological Capacity and Weather,  
414 *Journal of Geophysical Research: Biogeosciences*, [10.1029/2019jg005534](https://doi.org/10.1029/2019jg005534), 2020.
- 415 [Berry, Z. C., & Goldsmith, G. R.: Diffuse light and wetting differentially affect tropical tree leaf photosynthesis. \*New\*](#)  
416 [Phytologist](#), *225*(1), 143-153, [10.1111/nph.16121](https://doi.org/10.1111/nph.16121), 2020.
- 417 Bohlman, S. and O'Brien, S.: Allometry, adult stature and regeneration requirement of 65 tree species on Barro  
418 Colorado Island, Panama, *Journal of Tropical Ecology*, 22, 123-136, [10.1017/s0266467405003019](https://doi.org/10.1017/s0266467405003019), 2006.
- 419 Bohlman, S. and Pacala, S.: A forest structure model that determines crown layers and partitions growth and mortality  
420 rates for landscape-scale applications of tropical forests, *Journal of Ecology*, 100, 508-518, [10.1111/j.1365-](https://doi.org/10.1111/j.1365-2745.2011.01935.x)  
421 [2745.2011.01935.x](https://doi.org/10.1111/j.1365-2745.2011.01935.x), 2012.

422 Castro, A. O., Chen, J., Zang, C. S., Shekhar, A., Jimenez, J. C., Bhattacharjee, S., Kindu, M., Morales, V. H., and  
423 Rammig, A.: OCO-2 Solar-Induced Chlorophyll Fluorescence Variability across Ecoregions of the Amazon Basin  
424 and the Extreme Drought Effects of El Niño (2015–2016), *Remote Sensing*, 12, 10.3390/rs12071202, 2020.

425 Clark, D. B., Olivas, P. C., Oberbauer, S. F., Clark, D. A., and Ryan, M. G.: First direct landscape-scale measurement  
426 of tropical rain forest Leaf Area Index, a key driver of global primary productivity, *Ecol Lett*, 11, 163-172,  
427 10.1111/j.1461-0248.2007.01134.x, 2008.

428 Clark, D. A., Asao, S., Fisher, R., Reed, S., Reich, P. B., Ryan, M. G., Wood, T. E., and Yang, X.: Reviews and  
429 syntheses: Field data to benchmark the carbon cycle models for tropical forests, *Biogeosciences*, 14, 4663-4690,  
430 10.5194/bg-14-4663-2017, 2017.

431 Cogliati, S., Verhoef, W., Kraft, S., Sabater, N., Alonso, L., Vicent, J., Moreno, J., Drusch, M., and Colombo, R.:  
432 Retrieval of sun-induced fluorescence using advanced spectral fitting methods, *Remote Sensing of Environment*, 169,  
433 344-357, 10.1016/j.rse.2015.08.022, 2015.

434 Condit, R. S., Watts, K., Bohlman, S., Perez, R., Foster, R. B., and Hubbell, S. P.: Quantifying the deciduousness of  
435 tropical forest canopies under varying climates, *Journal of Vegetation Science*, 11, 10, 2000.

436 Dechant, B., Ryu, Y., Badgley, G., Zeng, Y., Berry, J. A., Zhang, Y., Goulas, Y., Li, Z., Zhang, Q., Kang, M., Li, J.,  
437 and Moya, I.: Canopy structure explains the relationship between photosynthesis and sun-induced chlorophyll  
438 fluorescence in crops, *Remote Sensing of Environment*, 241, 10.1016/j.rse.2020.111733, 2020.

439 Detto, M., Baldocchi, D., and Katul, G. G.: Scaling Properties of Biologically Active Scalar Concentration  
440 Fluctuations in the Atmospheric Surface Layer over a Managed Peatland, *Boundary-Layer Meteorology*, 136, 407-  
441 430, 10.1007/s10546-010-9514-z, 2010.

442 Detto, M., Wright, S. J., Calderon, O., and Muller-Landau, H. C.: Resource acquisition and reproductive strategies of  
443 tropical forest in response to the El Niño-Southern Oscillation, *Nature communications*, 9, 913, 10.1038/s41467-018-  
444 03306-9, 2018.

445 Frankenberg, C., Fisher, J. B., Worden, J. R., Badgley, G., Saatchi, S. S., Lee, J. E., Toon, G. C., Butz, A., Jung, M.,  
446 Kuze, A., and Yokota, T.: New global observations of the terrestrial carbon cycle from GOSAT: Patterns of plant  
447 fluorescence with gross primary productivity, *Geophysical Research Letters*, 38, 10.1029/2011gl048738, 2011.

448 Gamon, J. A., Kovalchuck, O., Wong, C. Y. S., Harris, A., and Garrity, S. R.: Monitoring seasonal and diurnal changes  
449 in photosynthetic pigments with automated PRI and NDVI sensors, *Biogeosciences*, 12, 4149-4159, 10.5194/bg-12-  
450 4149-2015, 2015.

451 Gao, W., Kim, Y., Ustin, S. L., Huete, A. R., Jiang, Z., and Miura, T.: Multisensor reflectance and vegetation index  
452 comparisons of Amazon tropical forest phenology with hyperspectral Hyperion data, *Remote Sensing and Modeling  
453 of Ecosystems for Sustainability IV*, 10.1117/12.734974, 2007.

454 Gelybó, G., Barcza, Z., Kern, A., and Kljun, N.: Effect of spatial heterogeneity on the validation of remote sensing  
455 based GPP estimations, *Agricultural and Forest Meteorology*, 174-175, 43-53, 10.1016/j.agrformet.2013.02.003,  
456 2013.

457 Glenn, E. P., Huete, A. R., Nagler, P. L., and Nelson, S. G.: Relationship Between Remotely-sensed Vegetation  
458 Indices, Canopy Attributes and Plant Physiological Processes: What Vegetation Indices Can and Cannot Tell Us About  
459 the Landscape, *Sensors*, 8, 24, 2008.

460 Guan, K., Pan, M., Li, H., Wolf, A., Wu, J., Medvigy, D., Caylor, K. K., Sheffield, J., Wood, E. F., Malhi, Y., Liang,  
461 M., Kimball, J. S., Saleska, Scott R., Berry, J., Joiner, J., and Lyapustin, A. I.: Photosynthetic seasonality of global  
462 tropical forests constrained by hydroclimate, *Nature Geoscience*, 8, 284-289, 10.1038/ngeo2382, 2015.

463 Guanter, L., Frankenberg, C., Dudhia, A., Lewis, P. E., Gómez-Dans, J., Kuze, A., Suto, H., and Grainger, R. G.:  
464 Retrieval and global assessment of terrestrial chlorophyll fluorescence from GOSAT space measurements, *Remote  
465 Sensing of Environment*, 121, 236-251, 10.1016/j.rse.2012.02.006, 2012.

466 Guanter, L., Zhang, Y., Jung, M., Joiner, J., Voigt, M., Berry, J. A., Frankenberg, C., Huete, A. R., Zarco-Tejada, P.,  
467 Lee, J. E., Moran, M. S., Ponce-Campos, G., Beer, C., Camps-Valls, G., Buchmann, N., Gianelle, D., Klumpp, K.,  
468 Cescatti, A., Baker, J. M., and Griffis, T. J.: Global and time-resolved monitoring of crop photosynthesis with  
469 chlorophyll fluorescence, *Proceedings of the National Academy of Sciences of the United States of America*, 111,  
470 E1327-1333, 10.1073/pnas.1320008111, 2014.

471 Hao, D., Asrar, G. R., Zeng, Y., Yang, X., Li, X., Xiao, J., Guan, K., Wen, J., Xiao, Q., Berry, J. A., and Chen, M.:  
472 Potential of hotspot solar-induced chlorophyll fluorescence for better tracking terrestrial photosynthesis, *Glob Chang  
473 Biol*, 10.1111/gcb.15554, 2021.

474 Heinsch, F. A., Maosheng, Z., Running, S. W., Kimball, J. S., Nemani, R. R., Davis, K. J., Bolstad, P. V., Cook, B.  
475 D., Desai, A. R., Ricciuto, D. M., Law, B. E., Oechel, W. C., Hyojung, K., Hongyan, L., Wofsy, S. C., Dunn, A. L.,  
476 Munger, J. W., Baldocchi, D. D., Liukang, X., Hollinger, D. Y., Richardson, A. D., Stoy, P. C., Siqueira, M. B. S.,  
477 Monson, R. K., Burns, S. P., and Flanagan, L. B.: Evaluation of remote sensing based terrestrial productivity from

478 MODIS using regional tower eddy flux network observations, *IEEE Transactions on Geoscience and Remote Sensing*,  
479 44, 1908-1925, 10.1109/tgrs.2005.853936, 2006.

480 Huete, A., Didan, K., Miura, T., Rodriguez, E. P., Gao, X., and Ferreira, L. G.: Overview of the radiometric and  
481 biophysical performance of the MODIS vegetation indices, *Remote Sensing of Environment*, 83, 19, 2002.

482 Huete, A. R., Restrepo-Coupe, N., Ratana, P., Didan, K., Saleska, S. R., Ichii, K., Panuthai, S., and Gamo, M.: Multiple  
483 site tower flux and remote sensing comparisons of tropical forest dynamics in Monsoon Asia, *Agricultural and Forest  
484 Meteorology*, 148, 748-760, 10.1016/j.agrformet.2008.01.012, 2008.

485 Jiang, Z., Huete, A., Didan, K., and Miura, T.: Development of a two-band enhanced vegetation index without a blue  
486 band, *Remote Sensing of Environment*, 112, 3833-3845, 10.1016/j.rse.2008.06.006, 2008.

487 Joiner, J., Yoshida, Y., Vasilkov, A. P., Yoshida, Y., Corp, L. A., and Middleton, E. M.: First observations of global  
488 and seasonal terrestrial chlorophyll fluorescence from space, *Biogeosciences*, 8, 637-651, 10.5194/bg-8-637-2011,  
489 2011.

490 Julitta, T.: Optical proximal sensing for vegetation monitoring, PhD Dissertation, Department of Earth and  
491 Environmental Sciences, University of Milano-Bicocca, 136 pp., 2015.

492 Jung, M., Reichstein, M., Margolis, H. A., Cescatti, A., Richardson, A. D., Arain, M. A., Arneth, A., Bernhofer, C.,  
493 Bonal, D., Chen, J., Gianelle, D., Gobron, N., Kiely, G., Kutsch, W., Lasslop, G., Law, B. E., Lindroth, A., Merbold,  
494 L., Montagnani, L., Moors, E. J., Papale, D., Sottocornola, M., Vaccari, F., and Williams, C.: Global patterns of land-  
495 atmosphere fluxes of carbon dioxide, latent heat, and sensible heat derived from eddy covariance, satellite, and  
496 meteorological observations, *Journal of Geophysical Research*, 116, 10.1029/2010jg001566, 2011.

497 Köhler, P., Guanter, L., Kobayashi, H., Walther, S., and Yang, W.: Assessing the potential of sun-induced fluorescence  
498 and the canopy scattering coefficient to track large-scale vegetation dynamics in Amazon forests, *Remote Sensing of  
499 Environment*, 769-785, 10.1016/j.rse.2017.09.025, 2017.

500 Lasslop, G., Reichstein, M., Detto, M., Richardson, A. D., and Baldocchi, D. D.: Comment on Vickers et al.: Self-  
501 correlation between assimilation and respiration resulting from flux partitioning of eddy-covariance CO<sub>2</sub> fluxes,  
502 *Agricultural and Forest Meteorology*, 150, 312-314, 10.1016/j.agrformet.2009.11.003, 2010.

503 Laurance, W. F., Uuseche, D. C., Rendeiro, J., Kalka, M., Bradshaw, C. J., Sloan, S. P., Laurance, S. G., Campbell, M.,  
504 Abernethy, K., Alvarez, P., Arroyo-Rodriguez, V., Ashton, P., Benitez-Malvido, J., Blom, A., Bobo, K. S., Cannon,  
505 C. H., Cao, M., Carroll, R., Chapman, C., Coates, R., Cords, M., Danielsen, F., De Dijn, B., Dinerstein, E., Donnelly,  
506 M. A., Edwards, D., Edwards, F., Farwig, N., Fashing, P., Forget, P. M., Foster, M., Gale, G., Harris, D., Harrison,  
507 R., Hart, J., Karpanty, S., Kress, W. J., Krishnaswamy, J., Logsdon, W., Lovett, J., Magnusson, W., Maisels, F.,  
508 Marshall, A. R., McClearn, D., Mudappa, D., Nielsen, M. R., Pearson, R., Pitman, N., van der Ploeg, J., Plumptre, A.,  
509 Poulsen, J., Quesada, M., Rainey, H., Robinson, D., Roetgers, C., Rovero, F., Scatena, F., Schulze, C., Sheil, D.,  
510 Struhsaker, T., Terborgh, J., Thomas, D., Timm, R., Urbina-Cardona, J. N., Vasudevan, K., Wright, S. J., Arias, G. J.,  
511 Arroyo, L., Ashton, M., Auzel, P., Babaasa, D., Babweteera, F., Baker, P., Banki, O., Bass, M., Bila-Isia, I., Blake,  
512 S., Brockelman, W., Brokaw, N., Bruhl, C. A., Bunyavejchewin, S., Chao, J. T., Chave, J., Chellam, R., Clark, C. J.,  
513 Clavijo, J., Congdon, R., Corlett, R., Dattaraja, H. S., Dave, C., Davies, G., Beisiegel Bde, M., da Silva Rde, N., Di  
514 Fiore, A., Diesmos, A., Dirzo, R., Doran-Sheehy, D., Eaton, M., Emmons, L., Estrada, A., Ewango, C., Fedigan, L.,  
515 Feer, F., Fruth, B., Willis, J. G., Goodale, U., Goodman, S., Guix, J. C., Guthiga, P., Haber, W., Hamer, K., Herbiner,  
516 I., Hill, J., Huang, Z., Sun, I. F., Ickes, K., Itoh, A., Ivanauskas, N., Jackes, B., Janovec, J., Janzen, D., Jiangming, M.,  
517 Jin, C., Jones, T., Justiniano, H., Kalko, E., Kasangaki, A., Killeen, T., King, H. B., Klop, E., Knott, C., Kone, I.,  
518 Kudavidanage, E., Ribeiro, J. L., Lattke, J., Laval, R., Lawton, R., Leal, M., Leighton, M., Lentino, M., Leonel, C.,  
519 Lindsell, J., Ling-Ling, L., Linsenmair, K. E., Losos, E., Lugo, A., Lwanga, J., Mack, A. L., Martins, M., McGraw,  
520 W. S., McNab, R., Montag, L., Thompson, J. M., Nabe-Nielsen, J., Nakagawa, M., Nepal, S., Norconk, M., Novotny,  
521 V., O'Donnell, S., Opiang, M., Ouboter, P., Parker, K., Parthasarathy, N., Pisciotta, K., Prawiradilaga, D., Pringle, C.,  
522 Rajathurai, S., Reichard, U., Reinartz, G., Renton, K., Reynolds, G., Reynolds, V., Riley, E., Rodel, M. O., Rothman,  
523 J., Round, P., Sakai, S., Sanaïotti, T., Savini, T., Schaab, G., Seidensticker, J., Siaka, A., Silman, M. R., Smith, T. B.,  
524 de Almeida, S. S., Sodhi, N., Stanford, C., Stewart, K., Stokes, E., Stoner, K. E., Sukumar, R., Surbeck, M., Tobler,  
525 M., Tschardtke, T., Turkalo, A., Umapathy, G., van Weerd, M., Rivera, J. V., Venkataraman, M., Venn, L., Vereza,  
526 C., de Castilho, C. V., Waltert, M., Wang, B., Watts, D., Weber, W., West, P., Whitacre, D., Whitney, K., Wilkie, D.,  
527 Williams, S., Wright, D. D., Wright, P., Xiankai, L., Yonzon, P., and Zamzani, F.: Averting biodiversity collapse in  
528 tropical forest protected areas, *Nature*, 489, 290-294, 10.1038/nature11318, 2012.

529 Lee, J. E., Frankenberg, C., van der Tol, C., Berry, J. A., Guanter, L., Boyce, C. K., Fisher, J. B., Morrow, E., Worden,  
530 J. R., Asefi, S., Badgley, G., and Saatchi, S.: Forest productivity and water stress in Amazonia: observations from  
531 GOSAT chlorophyll fluorescence, *Proceedings. Biological sciences / The Royal Society*, 280, 20130171,  
532 10.1098/rspb.2013.0171, 2013.

533 Lewis, S. L., Lloyd, J., Sitch, S., Mitchard, E. T. A., and Laurance, W. F.: Changing Ecology of Tropical Forests:  
534 Evidence and Drivers, *Annual Review of Ecology, Evolution, and Systematics*, 40, 529-549,  
535 10.1146/annurev.ecolsys.39.110707.173345, 2009.

536 Liangyun Liu, X. L., ZhihuiWang, and Bing Zhang: Measurement and Analysis of BidirectionalSIF Emissions in  
537 Wheat Canopies, *IEEE TRANSACTIONS ON GEOSCIENCE AND REMOTE SENSING*, 12, 2016.

538 Liu, J., Bowman, K. W., Schimel, D. S., Parazoo, N. C., Jiang, Z., Lee, M., Bloom, A. A., Wunch, D., Frankenberg,  
539 C., Sun, Y., O'Dell, C. W., Gurney, K. R., Menemenlis, D., Gierach, M., Crisp, D., and Eldering, A.: Contrasting  
540 carbon cycle responses of the tropical continents to the 2015-2016 El Nino, *Science*, 358, eaam5690,  
541 10.1126/science.aam5690, 2017.

542 Liu, L., Yang, X., Gong, F., Su, Y., Huang, G., and Chen, X.: The Novel Microwave Temperature Vegetation Drought  
543 Index (MTVDI) Captures Canopy Seasonality across Amazonian Tropical Evergreen Forests, *Remote Sensing*, 13,  
544 10.3390/rs13030339, 2021.

545 Liu, X., Liu, L., Zhang, S., and Zhou, X.: New Spectral Fitting Method for Full-Spectrum Solar-Induced Chlorophyll  
546 Fluorescence Retrieval Based on Principal Components Analysis, *Remote Sensing*, 7, 10626-10645,  
547 10.3390/rs70810626, 2015.

548 Logan, B. A., Adams, W. W., and Demmig-Adams, B.: Viewpoint:Avoiding common pitfalls of chlorophyll  
549 fluorescence analysis under field conditions, *Functional Plant Biology*, 34, 853, 10.1071/fp07113, 2007.

550 Magney, T. S., Frankenberg, C., Fisher, J. B., Sun, Y., North, G. B., Davis, T. S., Kornfeld, A., and Siebke, K.:  
551 Connecting active to passive fluorescence with photosynthesis: a method for evaluating remote sensing measurements  
552 of Chl fluorescence, *The New phytologist*, 1594-1608, 10.1111/nph.14662, 2017.

553 Malenovsky, Z., Mishra, K. B., Zemek, F., Rascher, U., and Nedbal, L.: Scientific and technical challenges in remote  
554 sensing of plant canopy reflectance and fluorescence, *Journal of experimental botany*, 60, 2987-3004,  
555 10.1093/jxb/erp156, 2009.

556 Malhi, Y.: The productivity, metabolism and carbon cycle of tropical forest vegetation, *Journal of Ecology*, 100, 65-  
557 75, 10.1111/j.1365-2745.2011.01916.x, 2012.

558 Medlyn, B. E.: Physiological basis of the light use efficiency model, *Tree Physiology*, 18, 167–176,  
559 <https://doi.org/10.1093/treephys/18.3.167>, 1998.

560 Meroni, M., Rossini, M., Guanter, L., Alonso, L., Rascher, U., Colombo, R., and Moreno, J.: Remote sensing of solar-  
561 induced chlorophyll fluorescence: Review of methods and applications, *Remote Sensing of Environment*, 113, 2037-  
562 2051, 10.1016/j.rse.2009.05.003, 2009.

563 Merrick, Pau, Jorge, Bennartz, and Silva: Spatiotemporal Patterns and Phenology of Tropical Vegetation Solar-  
564 Induced Chlorophyll Fluorescence across Brazilian Biomes Using Satellite Observations, *Remote Sensing*, 11,  
565 10.3390/rs11151746, 2019.

566 Merrick, T., Jorge, M. L. S. P., Silva, T. S. F., Pau, S., Rausch, J., Broadbent, E. N., and Bennartz, R.: Characterization  
567 of chlorophyll fluorescence, absorbed photosynthetically active radiation, and reflectance-based vegetation index  
568 spectroradiometer measurements, *International Journal of Remote Sensing*, 41, 6755-6782,  
569 10.1080/01431161.2020.1750731, 2020.

570 Mitchard, E. T. A.: The tropical forest carbon cycle and climate change, *Nature*, 559, 527-534, 10.1038/s41586-018-  
571 0300-2, 2018.

572 Monteith, J.L.. Climate and the efficiency of crop production in Britain, *Phil. Trans. R. Soc. Land.*, 281, 277-294,  
573 1977.

574 Morton, D. C., Rubio, J., Cook, B. D., Gastellu-Etcheberry, J. P., Longo, M., Choi, H., Hunter, M. O., and Keller, M.:  
575 Amazon forest structure generates diurnal and seasonal variability in light utilization, *Biogeosciences Discussions*,  
576 12, 19043-19072, 10.5194/bgd-12-19043-2015, 2015.

577 Morton, D. C., Nagol, J., Carabajal, C. C., Rosette, J., Palace, M., Cook, B. D., Vermote, E. F., Harding, D. J., and  
578 North, P. R.: Amazon forests maintain consistent canopy structure and greenness during the dry season, *Nature*, 506,  
579 221-224, 10.1038/nature13006, 2014.

580 Moya, I., Camenen, L., Evain, S., Goulas, Y., Cerovic, Z. G., Latouche, G., Flexas, J., and Ounis, A.: A new instrument  
581 for passive remote sensing1. Measurements of sunlight-induced chlorophyll fluorescence, *Remote Sensing of*  
582 *Environment*, 91, 186-197, 10.1016/j.rse.2004.02.012, 2004.

583 Plascyk, J. A.: The MK II Fraunhofer Line Discriminator (FLD -II) for Airborne and Orbital Remote Sensing of Solar-  
584 Stimulated Luminescence, *Optical Engineering*, 14, 8, 1975.

585 Porcar-Castell, A., Tyystjarvi, E., Atherton, J., van der Tol, C., Flexas, J., Pfundel, E. E., Moreno, J., Frankenberg, C.,  
586 and Berry, J. A.: Linking chlorophyll a fluorescence to photosynthesis for remote sensing applications: mechanisms  
587 and challenges, *Journal of experimental botany*, 65, 4065-4095, 10.1093/jxb/eru191, 2014.

588 R Development Core Team: R: A language and environment for statistical computing, R Foundation for Statistical  
589 Computing [code], 2010.

590 Rocha, A. V., Appel, R., Bret-Harte, M. S., Euskirchen, E. S., Salmon, V., and Shaver, G.: Solar position confounds  
591 the relationship between ecosystem function and vegetation indices derived from solar and photosynthetically active  
592 radiation fluxes, *Agricultural and Forest Meteorology*, 298-299, 10.1016/j.agrformet.2020.108291, 2021.

593 Rong Li, F. Z.: Accuracy assessment on reconstruction algorithms of solar-induced Fluorescence Spectrum,  
594 *Geoscience and Remote Sensing Symposium (IGARSS) IEEE International*, 1727-1730,

595 Rossini, M., Alonso, L., Cogliati, S., Damm, A., Guanter, L., Julitta, T., Meroni, M., Moreno, J., Panigada, C., Pinto,  
596 F., Rascher, U., Schickling, A., Schüttemeyer, D., Zemek, F., and Colombo, R.: Measuring sun-induced chlorophyll  
597 fluorescence: An evaluation and synthesis of existing field data, 5th International workshop on remote sensing of  
598 vegetation fluorescence, Paris, France, 1-5,

599 Rouse Jr, J. W., Haas, R. H., Schell, J. A., and Deering, D. W.: Paper A 20, *Third Earth Resources Technology Satellite-*  
600 *1 Symposium: The Proceedings of a Symposium Goddard Space Flight Center at Washington, DC 309*,

601 Running, S. W., Nemani, R. R., Heinsch, F. A., Zhao, M., Reeves, M., and Hashimoto, H.: A Continuous Satellite-  
602 Derived Measure of Global Terrestrial Primary Production, *BioScience*, 54, 547-551, 2004.

603 Ryu, Y., Jiang, C., Kobayashi, H., and Detto, M.: MODIS-derived global land products of shortwave radiation and  
604 diffuse and total photosynthetically active radiation at 5 km resolution from 2000, *Remote Sensing of Environment*,  
605 204, 812-825, 10.1016/j.rse.2017.09.021, 2018.

606 Saatchi, S. S., Harris, N. L., Brown, S., Lefsky, M., A., E. T., Mitchare, W. S., Zutta, B. R., Buerman, W., Lewis, S.  
607 L., Hagen, S., Petrova, S., White, L., Silman, M., and Morel, A.: Benchmark map of forest carbon stocks in tropical  
608 regions across three continents, *Proceedings of the National Academy of Sciences*, 108, 9899-9905, 2010.

609 Saatchi, S. S., Harris, N. L., Brown, S., Lefsky, M., Mitchard, E. T., Salas, W., Zutta, B. R., Buermann, W., Lewis, S.  
610 L., Hagen, S., Petrova, S., White, L., Silman, M., and Morel, A.: Benchmark map of forest carbon stocks in tropical  
611 regions across three continents, *Proceedings of the National Academy of Sciences of the United States of America*,  
612 108, 9899-9904, 10.1073/pnas.1019576108, 2011.

613 Samanta, A., Ganguly, S., and Myneni, R.: MODIS Enhanced Vegetation Index data do not show greening of Amazon  
614 forests during the 2005 drought, *New Phytologist*, 189, 4, 2010.

615 Schickling, A., Matveeva, M., Damm, A., Schween, J., Wahner, A., Graf, A., Crewell, S., and Rascher, U.: Combining  
616 Sun-Induced Chlorophyll Fluorescence and Photochemical Reflectance Index Improves Diurnal Modeling of Gross  
617 Primary Productivity, *Remote Sensing*, 8, 574, 10.3390/rs8070574, 2016.

618 Sims, D., Rahman, A., Cordova, V., Elmasri, B., Baldocchi, D., Bolstad, P., Flanagan, L., Goldstein, A., Hollinger,  
619 D., and Misson, L.: A new model of gross primary productivity for North American ecosystems based solely on the  
620 enhanced vegetation index and land surface temperature from MODIS, *Remote Sensing of Environment*, 112, 1633-  
621 1646, 10.1016/j.rse.2007.08.004, 2008.

622 Springer, K., Wang, R., and Gamon, J. A.: Parallel Seasonal Patterns of Photosynthesis, Fluorescence, and Reflectance  
623 Indices in Boreal Trees, *Remote Sensing*, 9, 1-18, 10.3390/rs9070691, 2017.

624 Sun, Y., Frankenberg, C., Wood, J. D., Schimel, D. S., Jung, M., Guanter, L., Drewry, D. T., Verma, M., Porcar-  
625 Castell, A., Griffis, T. J., Gu, L., Magney, T. S., Kohler, P., Evans, B., and Yuen, K.: OCO-2 advances photosynthesis  
626 observation from space via solar-induced chlorophyll fluorescence, *Science*, 358, eaam5747,  
627 10.1126/science.aam5747, 2017.

628 Torrence, C. and Compo, G. P.: A Practical Guide to Wavelet Analysis, *Bulletin of the American Meteorological*  
629 *Society*, 79, 61-79, 1998.

630 [Tucker, C., Red and photographic infrared linear combinations for vegetation monitoring, \*Remote Sensing of\*](#)  
631 [Environment, 8, 127-150, 1979.](#)

632 Turner, D. P., Ritts, W. D., Cohen, W. B., Gower, S. T., Zhao, M., Running, S. W., Wofsy, S. C., Urbanski, S., Dunn,  
633 A. L., and Munger, J. W.: Scaling Gross Primary Production (GPP) over boreal and deciduous forest landscapes in  
634 support of MODIS GPP product validation, *Remote Sensing of Environment*, 88, 256-270, 10.1016/j.rse.2003.06.005,  
635 2003.

636 Van Wittenberghe, S., Alonso, L., Verrelst, J., Moreno, J., and Samson, R.: Bidirectional sun-induced chlorophyll  
637 fluorescence emission is influenced by leaf structure and light scattering properties — A bottom-up approach, *Remote*  
638 *Sensing of Environment*, 158, 169-179, 10.1016/j.rse.2014.11.012, 2015.

639 Van Wittenberghe, S., Alonso, L., Verrelst, J., Hermans, I., Delegido, J., Veroustraete, F., Valcke, R., Moreno, J., and  
640 Samson, R.: Upward and downward solar-induced chlorophyll fluorescence yield indices of four tree species as  
641 indicators of traffic pollution in Valencia, *Environmental pollution*, 173, 29-37, 10.1016/j.envpol.2012.10.003, 2013.

642 Wang, C., Beringer, J., Hutley, L. B., Cleverly, J., Li, J., Liu, Q., and Sun, Y.: Phenology Dynamics of Dryland  
643 Ecosystems Along the North Australian Tropical Transect Revealed by Satellite Solar-Induced Chlorophyll  
644 Fluorescence, *Geophysical Research Letters*, 46, 5294-5302, 10.1029/2019gl082716, 2019.

645 Wang, S., Zhang, Y., Ju, W., Qiu, B., and Zhang, Z.: Tracking the seasonal and inter-annual variations of global gross  
646 primary production during last four decades using satellite near-infrared reflectance data, *The Science of the total  
647 environment*, 755, 142569, 10.1016/j.scitotenv.2020.142569, 2020.

648 Wickham, H.: *ggplot2: Elegant Graphics for Data Analysis*, Springer-Verlag [code], 2016.

649 Wickham, H.: *tidyverse: Easily Install and Load the 'Tidyverse' (R package  
650 version 1.2.1) [code]*, 2017.

651 Wickham, H., François, R., Henry, L., and Müller, K.: *dplyr: A Grammar of Data Manipulation (R package version  
652 0.7.8) [code]*, 2018.

653 Wright, S. J.: The future of tropical forests, *Ann N Y Acad Sci*, 1195, 1-27, 10.1111/j.1749-6632.2010.05455.x, 2010.

654 Wu, G., Guan, K., Jiang, C., Peng, B., Kimm, H., Chen, M., Yang, X., Wang, S., Suyker, A. E., Bernacchi, C. J.,  
655 Moore, C. E., Zeng, Y., Berry, J. A., and Cendrero-Mateo, M. P.: Radiance-based NIRv as a proxy for GPP of corn  
656 and soybean, *Environmental Research Letters*, 15, 10.1088/1748-9326/ab65cc, 2020.

657 Xu, L., Saatchi, S. S., Yang, Y., Myneni, R. B., Frankenberg, C., Chowdhury, D., and Bi, J.: Satellite observation of  
658 tropical forest seasonality: spatial patterns of carbon exchange in Amazonia, *Environmental Research Letters*, 10,  
659 084005, 10.1088/1748-9326/10/8/084005, 2015.

660 Yang, H., Yang, X., Zhang, Y., Heskell, M. A., Lu, X., Munger, J. W., Sun, S., and Tang, J.: Chlorophyll fluorescence  
661 tracks seasonal variations of photosynthesis from leaf to canopy in a temperate forest, *Glob Chang Biol*, 23, 2874-  
662 2886, 10.1111/gcb.13590, 2017.

663 Yang, J., Tian, H., Pan, S., Chen, G., Zhang, B., and Dangal, S.: Amazon droughts and forest responses: Largely  
664 reduced forest photosynthesis but slightly increased canopy greenness during the extreme drought of 2015/2016, *Glob  
665 Chang Biol*, 1919-1934, 10.1111/gcb.14056, 2018a.

666 Yang, K., Ryu, Y., Dechant, B., Berry, J. A., Hwang, Y., Jiang, C., Kang, M., Kim, J., Kimm, H., Kornfeld, A., and  
667 Yang, X.: Sun-induced chlorophyll fluorescence is more strongly related to absorbed light than to photosynthesis at  
668 half-hourly resolution in a rice paddy, *Remote Sensing of Environment*, 216, 658-673, 10.1016/j.rse.2018.07.008,  
669 2018b.

670 Yang, P., van der Tol, C., Campbell, P. K. E., and Middleton, E. M.: Fluorescence Correction Vegetation Index  
671 (FCVI): A physically based reflectance index to separate physiological and non-physiological information in far-red  
672 sun-induced chlorophyll fluorescence, *Remote Sensing of Environment*, 240, 10.1016/j.rse.2020.111676, 2020.

673 Yuan, W., Cai, W., Xia, J., Chen, J., Liu, S., Dong, W., Merbold, L., Law, B., Arain, A., Beringer, J., Bernhofer, C.,  
674 Black, A., Blanken, P. D., Cescatti, A., Chen, Y., Francois, L., Gianelle, D., Janssens, I. A., Jung, M., Kato, T., Kiely,  
675 G., Liu, D., Marcolla, B., Montagnani, L., Raschi, A., Rouspard, O., Varlagin, A., and Wohlfahrt, G.: Global  
676 comparison of light use efficiency models for simulating terrestrial vegetation gross primary production based on the  
677 LaThuile database, *Agricultural and Forest Meteorology*, 192–193, 108–120,  
678 <https://doi.org/10.1016/j.agrformet.2014.03.007>, 2014.

679 Zarco-Tejada, P. J., González-Dugo, V., and Berni, J. A. J.: Fluorescence, temperature and narrow-band indices  
680 acquired from a UAV platform for water stress detection using a micro-hyperspectral imager and a thermal camera,  
681 *Remote Sensing of Environment*, 117, 322-337, 10.1016/j.rse.2011.10.007, 2012.

682 Zarco-Tejada, P. J., Morales, A., Testi, L., and Villalobos, F. J.: Spatio-temporal patterns of chlorophyll fluorescence  
683 and physiological and structural indices acquired from hyperspectral imagery as compared with carbon fluxes  
684 measured with eddy covariance, *Remote Sensing of Environment*, 133, 102-115, 10.1016/j.rse.2013.02.003, 2013.

685 Zarco-Tejada, P. J., Miller, J. R., Mohammed, G. H., Noland, T. L., and Sampson, P. H.: Estimation of chlorophyll  
686 fluorescence under natural illumination from hyperspectral data, *International Journal of Applied Earth Observation  
687 and Geoinformation*, 3, 7, 2001.

688 Zeng, Y., Badgley, G., Dechant, B., Ryu, Y., Chen, M., and Berry, J. A.: A practical approach for estimating the  
689 escape ratio of near-infrared solar-induced chlorophyll fluorescence, *Remote Sensing of Environment*, 232,  
690 10.1016/j.rse.2019.05.028, 2019.

691 Zhang, Z., Zhang, Y., Zhang, Q., Chen, J. M., Porcar-Castell, A., Guanter, L., Wu, Y., Zhang, X., Wang, H., Ding,  
692 D., and Li, Z.: Assessing bi-directional effects on the diurnal cycle of measured solar-induced chlorophyll fluorescence  
693 in crop canopies, *Agricultural and Forest Meteorology*, 295, 10.1016/j.agrformet.2020.108147, 2020.

694 Zhang, Z., Zhang, Y., Zhang, Y., Gobron, N., Frankenberg, C., Wang, S., and Li, Z.: The potential of satellite FPAR  
695 product for GPP estimation: An indirect evaluation using solar-induced chlorophyll fluorescence, *Remote Sensing of  
696 Environment*, 240, 10.1016/j.rse.2020.111686, 2020.



697 Zhao, M., Running, S., Heinsch, F. A., and Nemani, R.: MODIS-Derived Terrestrial Primary Production, 11, 635-  
698 660, 10.1007/978-1-4419-6749-7\_28, 2010.  
699 Zhu, X. and Liu, D.: Improving forest aboveground biomass estimation using seasonal Landsat NDVI time-series,  
700 ISPRS Journal of Photogrammetry and Remote Sensing, 102, 222-231, 10.1016/j.isprsjprs.2014.08.014, 2015.  
701  
702
